1 **PYK2 controls intestinal inflammation via activation of IRF5 in macrophages**

2 Grigory Ryzhakov<sup>1†\*</sup>, Hannah Almuttaqi<sup>1\*</sup>, Alastair L. Corbin<sup>1</sup>, Tariq Khoyratty<sup>1</sup>, Dorothee  
3 Berthold<sup>1</sup>, Samuel Bullers<sup>1</sup>, Hayley L Eames<sup>1</sup>, Zhichao Ai<sup>1</sup>, Sarah Bonham<sup>3</sup>, Roman Fischer<sup>3</sup>,  
4 Luke Jostins-Dean<sup>1</sup>, Simon P.L. Travis<sup>2</sup>, Benedikt M. Kessler<sup>3</sup> and Irina A. Udalova<sup>1#</sup>

5

6 <sup>1</sup>*University of Oxford, Kennedy Institute of Rheumatology, Oxford, United Kingdom*

7 <sup>2</sup>*Translational Gastroenterology Unit, NIHR Oxford Biomedical Research Centre, Oxford*

8 *University Hospitals NHS Foundation Trust, John Radcliffe Hospital, Oxford, United Kingdom*

9 <sup>3</sup>*Target Discovery Institute, Nuffield Department of Medicine, University of Oxford, Oxford,*

10 *United Kingdom*

11 <sup>†</sup>*present address – Novartis Institutes for BioMedical Research, Novartis Pharma AG, Novartis*

12 *Campus, Basel, Switzerland*

13

14 <sup>#</sup>*correspondent author – [irina.udalova@kennedy.ox.ac.uk](mailto:irina.udalova@kennedy.ox.ac.uk)*

15 *\*These authors contributed equally to this work.*

16

17 **Abstract**

18 Inflammatory bowel disease (IBD) is a group of inflammatory disorders of the gastro-intestinal  
19 tract caused by a complex combination of genetic and environmental factors. Interferon  
20 regulating factor 5 (IRF5) is a multifunctional regulator of immune responses, which plays a  
21 key pathogenic role in mouse colitis models and is a genetic risk factor for IBD. A screen of a  
22 protein kinase inhibitor library in macrophages revealed a list of putative IRF5 kinases. Among  
23 the top hits validated in multiple *in vitro* assays, protein-tyrosine kinase 2-beta (PTK2B or  
24 PYK2) was identified as the only IBD genetic risk factor, known to impact gene expression in  
25 myeloid cells<sup>1,2</sup>. Phospho-proteomics and mutagenesis analyses established that PYK2 directly  
26 phosphorylates and activates IRF5 at tyrosine (Y) 171. IRF5 nuclear translocation and  
27 recruitment to target genes was impaired in PYK2-deficient cells or in cells treated with PYK2  
28 inhibitors. Importantly, macrophage transcriptomic signature under PYK2 inhibition  
29 phenocopied IRF5 deficiency. Treatment with a PYK2 inhibitor reduced pathology and  
30 inflammatory cytokine production in *Helicobacter hepaticus* + anti-IL-10R antibody induced  
31 colitis model. It also decreased levels of pro-inflammatory cytokines in human colon biopsies  
32 taken from patients with ulcerative colitis. Thus, we have identified a major role for PYK2 in  
33 regulating the inflammatory response and mapped its activity to the IRF5 innate sensing  
34 pathway, opening opportunities for therapeutic interference with it in IBD and other  
35 inflammatory conditions.

36 **MAIN**

37 A recent single-cell transcriptomic analysis of colon biopsies from patients with ulcerative  
38 colitis (UC) provided a framework for linking GWAS risk loci with specific cell types and  
39 functional pathways and helped to nominate causal genes across GWAS loci<sup>3</sup>, amongst them  
40 Interferon regulatory factor 5 (IRF5). IRF5 is a multifunctional regulator of immune  
41 responses<sup>4-6</sup>. The IRF5 risk variant has consistent effects across monocytes and macrophage  
42 conditions, but also impacts gene expression and splicing across a wide range of other immune  
43 cells and tissues<sup>7</sup>.

44 Recent studies using IRF5-deficient mice have established a critical role of this transcription  
45 factor in the pathogenesis of mouse models of colitis<sup>8,9</sup>. IRF5 is proposed to exert its molecular  
46 function via a cascade of events involving its phosphorylation, ubiquitination, dimerisation,  
47 nuclear translocation and selective binding to its target genes to enable their expression<sup>10</sup>.  
48 Despite its known physiological role, the molecular mechanisms of IRF5 activation are still  
49 debated. Several kinases including TBK1, RIP2, IKK $\epsilon$ , IRAK4, TAK1, and IKK $\beta$  have been  
50 proposed to phosphorylate and activate IRF5<sup>11-17</sup>, while IKK $\alpha$  inhibits IRF5<sup>18</sup>. Lyn, a Src  
51 family kinase has been shown negatively to regulate IRF5 in the TLR-MyD88 pathway in a  
52 kinase independent manner via direct binding to IRF5<sup>19</sup>.

53 In this study, we identified another nominated causal gene for UC<sup>3</sup>, Protein Tyrosine Kinase  
54 2b (PTK2B/PYK2), as a key regulator of IRF5 activation, macrophage inflammatory response,  
55 and intestinal pathology extending its currently accepted function in macrophage morphology  
56 and migration<sup>20</sup>.

57

58 We have previously established an *in vitro* reporter system for measuring IRF5-dependent  
59 transcription based on the TNF (IRF5-dependent gene)-promoter driven luciferase construct,  
60 which contains a number of interferon-stimulated response elements (ISREs)<sup>21</sup>. In our hands

61 the TNF promoter reporter consistently showed a stronger response to IRF5 than the standardly  
62 used ISRE-luciferase reporter (**Supplementary Fig. 1a, b**), either due to the number of ISRE  
63 sites and/or previously reported IRF5 cooperation with NF- $\kappa$ B RelA<sup>22</sup>. This reporter system  
64 was used to screen a library of small molecules<sup>23</sup>, for which inhibitory properties against 221  
65 protein kinases in the Protein Kinase Inhibitors Screen (PKIS) have been established  
66 (**Supplementary Fig. 1c, d, e**). After the first screen in RAW264.7 macrophages and 2 rounds  
67 of re-screening using different cell types and three different inhibitor concentrations, we  
68 composed the final list of 34 candidate IRF5 kinases, among which TBK1, IKKe and IRAK4  
69 were previously proposed to target IRF5<sup>12,16,24</sup> (**Fig. 1a, Source Data 1**).

70

71 For further functional validation we selected poorly explored proteins or those with known  
72 links to inflammatory processes – PYK2, HIPK4, ARK5, CLK2, MARK3, JNK2 and MST1.  
73 We then cloned the cDNAs encoding them into mammalian expression vectors and tested them  
74 in functional assays. As controls, we included into these assays RIP2 kinase, the known  
75 intermediate in the IRF5-dependent innate immune signalling pathways<sup>11</sup>. When we  
76 overexpressed the kinases with IRF5 and TNF-luciferase reporter in HEK-293  
77 TLR4/CD14/MD-2 cells, we found that overexpression of PYK2, JNK2 or MARK3, boosted  
78 IRF5-dependent TNF-reporter activation (**Fig. 1b**). Similar to the known IRF5 binding partners  
79 RIP2 and RelA<sup>11,22,25</sup>, PYK2 could strongly bind IRF5 in co-immunoprecipitation assays, while  
80 HIPK4, ARK5 and JNK2 showed only weak association with IRF5 (**Fig. 1c**). We further tested  
81 the ability of these kinases to phosphorylate overexpressed IRF5 in 293 ET cell lysates  
82 (**Supplementary Fig. 1f**). We were able to detect phosphorylated IRF5 in the presence of  
83 HIPK4, CLK2, JNK2, MST1, PYK2 and RIP2 as a positive control (**Fig. 1d**). Lastly, we  
84 examined the evidence of genetic association of the selected kinases with IBD and found that  
85 PYK2 was the only known genetic risk factor<sup>26</sup>. Moreover, the risk variant for PYK2 was

86 shown to impact gene expression in monocytes and macrophages<sup>27</sup>. Based on observed  
87 functional interactions with IRF5 and genetic association with IBD, PYK2 was singled out for  
88 further investigation in macrophages (**Supplementary Fig. 1g**).

89

90 In RAW264.7 macrophages we could detect PYK2 binding to IRF5 at the endogenous level  
91 (**Fig. 2a**). In line with previous studies, we also found LPS-induced PYK2 phosphorylation  
92 on Y402 (**Fig. 2b**)<sup>28,29</sup>. To investigate the kinase's role in the TLR4/IRF5 signalling axis, we  
93 generated IRF5- and PYK2-deficient mouse RAW264.7 macrophages using a CRISPR-Cas9  
94 approach (**Supplementary Fig. 2a**). First, we explored the impact of PYK2 deficiency on  
95 IRF5-dependent signalling by transfecting wild type (WT) and PYK2-deficient RAW264.7  
96 macrophages with IRF5-expressing and the TNF-promoter driven luciferase plasmid. We  
97 observed a marked reduction of the LPS-induced reporter activity in IRF5 expressing cells  
98 lacking PYK2 (**Fig. 2c**). When we expressed recombinant PYK2 in PYK2-deficient cells, we  
99 achieved a partial reconstitution of the PYK2 levels in RAW264.7 macrophages and a partial  
100 restoration of the reporter activity (**Supplementary Fig. 2b, c**). Next, we examined if PYK2  
101 deficiency would directly impact IRF5 activation and function by measuring IRF5 recruitment  
102 to its target gene promoter and enhancer regions using chromatin immunoprecipitation (ChIP)  
103 assay<sup>4,21</sup>. IRF5 recruitment to *Il6*, *Il1a* and *Tnf* gene promoters was impaired in PYK2 knockout  
104 cells (**Fig. 2d, Supplementary Fig. 2d**). Consequently, we observed attenuated recruitment of  
105 RNA polymerase II at the same promoters indicating reduced gene transcription (**Fig. 2d,**  
106 **Supplementary Fig. 2d**). We also detected reduction in mRNA induction of these cytokines,  
107 as well as chemokines *Ccl4*, *Ccl5*, by LPS in PYK2-deficient cells, comparable to or even  
108 stronger than in IRF5 knockout cells (**Fig. 2e, Supplementary Fig. 2e**). Conversely, LPS-  
109 induced IL-10 induction was increased in PYK2 knockout (**Supplementary Fig. 2e**), similarly  
110 to our previous findings in IRF5 knockout cells<sup>4</sup>.

111 To validate our observations in primary cells, we utilised immortalised myeloid progenitor  
112 HoxB8 cells<sup>30</sup>, which differentiated into non-proliferating mature macrophages after GM-CSF-  
113 induced differentiation for 5 days (**Supplementary Fig. 3a**). Using the CRISP-Cas9 approach,  
114 we generated stable knockout of IRF5 and PYK2 in these cells and validated their absence by  
115 western blot analysis (**Supplementary Fig. 3b**). After 5 days of ex vivo differentiation in the  
116 presence of GM-CSF, HoxB8 progenitors deficient in IRF5 or PYK2 gave rise to mature  
117 macrophages, comparable to the wt cells, but the levels of inflammatory cytokine and  
118 chemokine production were significantly reduced in HoxB8 macrophages deficient in IRF5 or  
119 PYK2 (**Supplementary Fig. 3c**). Thus, PYK2 acts as a critical regulator of IRF5-dependent  
120 transcription and inflammatory response induced by LPS in macrophages.

121  
122 To characterise potential PYK2 target residues in IRF5, we employed phospho-proteomics.  
123 Endogenous IRF5 was immuno-precipitated from the lysates of LPS-stimulated WT and  
124 PYK2-deficient RAW264.7 macrophages, and the phospho-peptides were further enriched  
125 from the total proteolytic digests. Peptide masses and quantities were analysed by nano ultra-  
126 high-pressure liquid chromatography coupled with mass spectrometry (nUPLC-MS/MS). In  
127 line with previously published reports<sup>14,15</sup> we identified the Ser-445 IKK $\beta$ -dependent site in  
128 both WT and PYK2-deficient cells (**Fig. 2f, Supplementary Fig. 4a, b**). In addition,  
129 endogenous IRF5 was phosphorylated at residues Ser-172, Ser-300, Tyr-334 in both WT and  
130 PYK2-deficient cells (**Fig. 2f, Supplementary Fig. 4a, b**). Interestingly, we could only detect  
131 Y171 phosphorylation in WT cells (**Fig. 2f, g Supplementary Fig. 4b**), while S56 and Y312  
132 residues were modified in PYK2-deficient cells (**Fig. 2f, Supplementary Fig. 4a, b**), possibly  
133 reflecting on modification by other enzymes. In fact, Src tyrosine kinase Lyn was capable of  
134 phosphorylating IRF5 at orthologues of Y312 and Y334 sites in *in vitro* co-expression  
135 system<sup>19</sup>. We individually mutated these sites (Y171, Y312, Y334) as well as the published

136 Y104 site<sup>31</sup> into phenylalanine residues and explored the consequence of these mutations in the  
137 above-mentioned reporter and *in vitro* phosphorylation assays (**Supplementary Fig. 1a, f**).  
138 The Y172F mutant of human v2 IRF5 (Y171 of mouse IRF5) and the double mutant Y172,  
139 S173A (Y171, S172 of mouse IRF5) (**Fig. 2h**) both showed diminished ability to activate the  
140 TNF-luciferase reporter in the presence of PYK2, whereas the Y104F, Y329F (mouse Y312)  
141 and Y351F (mouse Y334) mutations had no inhibitory effect (**Fig. 2h**). Similarly, we observed  
142 reduction in PYK2-dependent phosphorylation of IRF5 Y172 and Y172/S173 but not other  
143 IRF5 mutants (**Fig. 2i**). Together, these results indicate that PYK2 mediates LPS-induced  
144 activation of IRF5, by phosphorylating the tyrosine site Y172 (mouse Y171) of IRF5.

145  
146 Recently, specific inhibitors of PYK2 and a related kinase FAK have been developed<sup>32</sup>. One  
147 of them called defactinib (also known as VS-6063 or PF-04554878), with high selectivity to  
148 PYK2 and FAK1 and low affinity to kinases outside the family<sup>33</sup>, has been successfully used  
149 to tackle cancer in a mouse model and is currently being tested in clinical trials<sup>34,35</sup>. Here we  
150 explored the effect of defactinib on IRF5 activation and IRF5-dependent gene expression by  
151 macrophages. We first established the concentration range of defactinib well tolerated by  
152 RAW264.7 macrophages (**Supplementary Fig. 5a**). At such concentrations (0.3-1 $\mu$ M), it  
153 reduced LPS induced PYK2 phosphorylation (**Supplementary Fig. 5b**) and effectively  
154 inhibited TNF reporter activity and gene expression in RAW264.7 macrophages in a dose  
155 dependent manner (**Supplementary Fig. 5c, d**). Moreover, defactinib inhibited TNF reporter  
156 activity in wt and IRF5-deficient RAW264.7 macrophages in which IRF5 expression was  
157 restored via ectopic expression of IRF5, but not in PYK2-deficient cells (**Fig. 3a**), suggesting  
158 that defactinib acts in an IRF5- and PYK2-specific manner. PF-573228 inhibitor with described  
159 50 - 250-fold higher selectivity for FAK over PYK2<sup>36</sup>, also reduced TNF reporter activity but  
160 at a higher concentration than defactinib (**Supplementary Fig. 5e**). We speculated that PF-

161 573228 may be targeting PYK2 in this system, and indeed observed no further inhibition in  
162 PYK2-deficient cells (**Supplementary Fig. 5e**). The residual LPS-induced TNF reporter  
163 activity in cells treated with defactinib and PYK2 deficient cells (**Fig. 2c**) is consistent with the  
164 involvement of other PYK2 independent pathways in control of the TNF gene. As NF- $\kappa$ B is a  
165 known critical regulator of *TNF*<sup>37</sup>, we examined NF- $\kappa$ B activation in the cells deficient in  
166 PYK2 and/or treated with defactinib. Contrary to the results obtained in RAW264 cell lines  
167 stably expressing shRNA of PYK2<sup>28</sup>, we observed little effect on the p65/RelA  
168 phosphorylation and I $\kappa$ B $\alpha$  degradation in polyclonal RAW264 cell populations with CRISPR-  
169 Cas9 mediated knock-out of PYK2 and/or in cells treated with defactinib (**Supplementary Fig.**  
170 **5f**). We also detected no reduction in NF- $\kappa$ B reporter activity following treatment with  
171 defactinib (**Supplementary Fig. 5g**). In addition, defactinib prevented LPS-induced nuclear  
172 translocation of IRF5 but not p65/RelA (**Fig. 3b**), ruling out a major role for NF- $\kappa$ B in PYK2  
173 signalling pathway in these cells.

174 Mirroring our PYK2 deficiency data in RAW264.7 macrophages (**Fig. 2**), LPS-induced IRF5  
175 and RNA polymerase II recruitment to its target promoters was suppressed in primary mouse  
176 bone marrow derived macrophages (BMDMs) treated with defactinib (**Fig. 3c**). The expression  
177 of some pro-inflammatory cytokines and chemokines was also effectively suppressed by  
178 defactinib (**Fig. 3d, Supplementary Fig. 6b**), without affecting cell viability (**Supplementary**  
179 **Fig. 6a**). Similar results were obtained in macrophages in response to activation of C-type  
180 lectin receptor Dectin-1 pathway, in which IRF5 has been shown to play a key role<sup>38</sup>, with  
181 WGP (dispersible whole glycan particles) (**Supplementary Fig. 6c**).

182 To investigate the global impact of PYK2 inhibition on IRF5 target gene expression, we  
183 compared LPS-induced transcriptomes in WT and IRF5 KO BMDMs treated with either  
184 defactinib or vehicle. Principle component analysis (PCA) of differentially expressed genes  
185 (DEGs) ( $p < 0.05$ ) clearly separated WT and IRF5 KO, as well as untreated and LPS-treated



186 sample groups (**Fig. 3e**). LPS stimulated WT samples treated with defactinib or vehicle were  
187 also clearly separated, with the defactinib treated samples grouping closely with the IRF5<sup>-/-</sup>.  
188 Conversely, defactinib had very little effect on IRF5<sup>-/-</sup> cells stimulated with LPS (**Fig. 3e**). This  
189 was reflected in the number of DEGs: 4,026 for WT and only 217 for IRF5<sup>-/-</sup> BMDMs treated  
190 with defactinib at 2 h of post LPS stimulation (**Fig. 3f, Supplementary Fig. 6d**). Gene ontology  
191 (GO) analysis for defactinib down-regulated genes revealed that they are predominantly pro-  
192 inflammatory in nature (e.g. cellular response to interferon-beta, regulation of inflammatory  
193 response, cytokine activity etc). These GO terms were also enriched in LPS induced genes, and  
194 in IRF5 up-regulated genes, suggesting that defactinib is highly specific for IRF5 target genes<sup>22</sup>  
195 (**Fig. 3g**). We next investigated the correlation between IRF5 regulated genes and defactinib  
196 target genes. The majority of IRF5 up-regulated genes were strongly repressed by defactinib  
197 and there was a high degree of overlap between IRF5 up- and defactinib down- regulated genes,  
198 including *Il1a*, *Il1b*, *Il6*, *Il12a*, *Il12b*, *Il23a*, *Ccl3*, *Ccl4* etc (**Fig. 3h, Fig. Supplementary Fig.**  
199 **6b**). Interestingly, there was also a smaller overlap between IRF5 down-regulated genes and  
200 defactinib up-regulated genes, suggesting that the actions of IRF5 and defactinib are in direct  
201 opposition to each other. Similar to our finding in mouse BMDMs, we saw robust inhibition of  
202 LPS-induced expression and production of IRF5-dependent cytokines in human monocyte  
203 derived macrophages treated with defactinib at 0.5-5  $\mu$ M concentrations, which did not affect  
204 cell viability (**Supplementary Fig. 7a, b, c**). Taken together, PYK2 inhibition suppresses  
205 IRF5-dependent innate sensing and inflammatory response in both mouse and human  
206 macrophages.

207

208 IRF5 activity in mononuclear phagocytes (MNs) plays a critical role in the pathogenesis of  
209 intestinal inflammation and that mice deficient in IRF5 are protected from overblown colitis<sup>8,9</sup>.  
210 Here we explored if inhibition of Pyk2 would also improve the intestinal immunopathology in  
211 a model of *Helicobacter hepaticus* infected and anti-IL-10R monoclonal antibodies  
212 administered (Hh+anti-IL10R) colitis, which is characterised by IL-23-dependent intestinal  
213 inflammation along with a robust T helper type 1/type 17 (Th1/Th17)-polarized effector T cell  
214 response<sup>39</sup> (**Supplementary Fig. 8a**). As expected, Hh+anti-IL10R-infected mice developed

215 inflammation in the colon after a week. However, intestinal pathology, as well as immune cell  
216 infiltrate, and PYK2 activation in colon tissue were reduced in the animals, which received  
217 defactinib (**Fig. 4a, b, c; Supplementary Fig. 8b, c**). We also observed attenuated induction  
218 of *Il1a*, *Il1b*, *Il6*, *Tnf*, *Il12b*, *Ccl4* and other pro-inflammatory cytokines and chemokines<sup>40</sup> in  
219 the colon of defactinib-treated Hh+anti-IL-10R infected animals (**Fig. 4d**). To examine if the  
220 observed reduction in cytokine expression reflected on a lower number of monocytes  
221 infiltrating the colon or was related to their intrinsic reprogramming, we also analysed gene  
222 expression in total colonic leukocytes and isolated monocyte/macrophages. Interestingly, the  
223 downregulation of *Il6*, *Tnf*, *Il12b* and *Ccl4* expression in response to defactinib was detected in  
224 (1) colon tissue, (2) total colonic leukocytes and (3) isolated colonic monocytes and  
225 macrophages, while the reduction of *Ccl5* expression and an upward trend in *Il10* expression  
226 was only observed in isolated macrophages, indicating that production of these mediators by  
227 other cells may mask the effect of IRF5 pathway inhibition in macrophages (**Supplementary**  
228 **Fig. 8d**).

229  
230 Next, we tested the impact of PYK2 inhibition in biopsies derived from the colonic mucosa of  
231 patients with active ulcerative colitis by measuring cytokine production at concentrations not  
232 affecting cell viability in these samples (**Supplementary Fig. 9 a, b**). We found elevated  
233 cytokine production in biopsies obtained from the sites of active inflammation in comparison  
234 to those from adjacent non-inflamed colon. Incubation with increasing doses of defactinib  
235 significantly lowered IL-6 and IL-12p70, identified as part of a cassette of inflammatory  
236 molecules that mark anti-TNF $\alpha$ -resistant IBD<sup>41</sup> (**Fig. 4e**). We also observed a trend towards  
237 increased IL-10 production by the defactinib treated biopsies, but production of IL-1 $\beta$  appeared  
238 to be unaffected. Therefore, pharmacological inhibition of PYK2 effectively dampens  
239 intestinal inflammation, positioning defactinib and related PYK2 inhibitors as attractive  
240 molecules for repurposing to treat patients with UC.

241  
242 In conclusion, we propose the following pathway involving Pyk2 and IRF5 in macrophages.  
243 Upon TLR4 stimulation by LPS or Dectin-1 stimulation by glucan, PYK2 is activated by

244 phosphorylation at Tyr-402<sup>28</sup>. MyD88 is likely to be the essential linking adaptor between  
245 TLRs and PYK2/IRF5 complex as earlier studies have shown impairment of PYK2 activation  
246 in TLR ligand treated MyD88-deficient cells<sup>28</sup>. PYK2 autophosphorylation has been suggested  
247 to occur with the help of Src and possibly other kinases<sup>42,43</sup>. The recruitment of PYK2 to IRF5  
248 upon Dectin-1 stimulation is likely to be Syk-dependent<sup>44</sup>. We show that PYK2 phosphorylates  
249 IRF5 on site Tyr-171 (mouse) contributing to its activation and transcription of pro-  
250 inflammatory cytokines (**Supplementary Fig. 10**). Multiple sites of phosphorylation detected  
251 in IRF5, both serine and tyrosine, highlight the complexity of IRF5 activation and multiplicity  
252 of signalling pathways<sup>11,19,45,46</sup>. Yet, a clear mechanistic interaction between two established  
253 IBD risk genes, PYK2 and IRF5, in macrophages, identified in this study, combined with an  
254 acceptable toxicological profile of PYK2 inhibitor defactinib shown in cancer clinical trials<sup>47</sup>,  
255 deserves a closer look from the therapeutic perspective. We propose that defactinib is an  
256 attractive molecules for repurposing to treat patients with ulcerative colitis<sup>8,9</sup>, and with other  
257 inflammatory conditions, such as arthritis<sup>40,48</sup> acute lung injury<sup>40</sup> and atherosclerosis<sup>49</sup>, in  
258 which IRF5 function in macrophages has been intimately linked to pathogenicity. It may even  
259 prove useful in dampening lung inflammation in the severe COVID 19 patients, whose lungs  
260 are filled with monocyte-derived macrophages expressing high levels of IRF molecules,  
261 including IRF5<sup>50</sup>.

262 **Acknowledgements:**

263 We are grateful to Dr Jelena Bezbradica-Mircovic (University of Oxford) for critical reading  
264 of the manuscript and useful comments. This work was supported by the Versus Arthritis (PhD  
265 studentship 209966 to HA), the BRC3 Gastroenterology and Mucosal Immunology (ALC and  
266 ST) and the Wellcome Trust (Investigator Award 209422/Z/17/Z to IAU). We thank GSK for  
267 providing their published kinase inhibitor library for this project.

268 **Methods**

269 **Reagents.**

270 **Animals.** Mice were bred and maintained under SPF conditions in accredited animal facilities  
271 at the University of Oxford. All procedures were conducted according to the Operations of  
272 Animals in Scientific Procedures Act (ASPA) of 1986 and approved by the Kennedy Institute  
273 of Rheumatology Ethics Committee. Animals were housed in individually ventilated cages at  
274 a constant temperature with food and water ad libitum. C57Bl/6 mice were purchased from the  
275 University of Oxford BMS.

276

277 **Cell culture.** RAW264.7 and 293 TLR4/CD14/MD-2 cells were cultured in DMEM (Lonza)  
278 supplemented with 10 % FBS (Gibco) and 1 % Pen/Strep (Lonza). Bone marrow cells were  
279 extracted from wild type mice and cultured with recombinant GM-CSF (20ng/mL; Peprotech).  
280 On day 8, adherent cells were replated, and stimulated with either LPS (100ng/mL, Enzo) or  
281 whole glucan particles (100 µg/mL, Invivogen).

282 Human monocytes were isolated from leukocyte cones of healthy blood donors. Peripheral  
283 blood mononuclear cells (PBMC) were enriched by Ficoll gradient. Monocyte-derived  
284 macrophages were generated using adherence method selection and GM-CSF differentiation.  
285 Whole PBMC ( $50 \times 10^6$ ) were plated in RPMI-1640 medium for 90 min. After 2 washes with  
286 PBS, adherent monocytes were differentiated into macrophages over a 5 days in the presence  
287 of 50 ng/mL GM-CSF (Peprotech) in RPMI supplemented with 10% foetal calf serum (FCS)  
288 (Sigma-Aldrich), 100 U/mL penicillin, 100 mg/mL streptomycin, 30 mM HEPES, and 0.05  
289 mM  $\beta$ -mercaptoethanol.

290 Hoxb8 macrophage progenitors were a gift from the Sykes Lab (Harvard Medical School).

291 Progenitors were cultured in RMPI-1640 medium (Lonza) supplemented with 10% FBS  
292 (Gibco),  $\beta$ -mercaptoethanol (30 mM; Life Technologies), recombinant GM-CSF (10ng/ml;

293 Peprotec) and  $\beta$ -estradiol (1  $\mu$ M; Sigma-Aldrich). To differentiate into macrophages,  
294 progenitors were washed three times with RPMI 1640 medium to remove the  $\beta$ -estradiol and  
295 incubated in complete RPMI 1640 medium supplemented with 10% heat-inactivated FBS,  
296 30 $\mu$ M  $\beta$ -mercaptoethanol, and 20 ng/mL GM-CSF and incubated for 4 days. All cells were  
297 incubated in a 5 % CO<sub>2</sub> humidified atmosphere at 37°C.

298

299

300 **RNA extraction and Quantitative Real-Time PCR.** Total RNAs were isolated from cells  
301 using RNeasy Mini Kit (Qiagen) and reverse transcribed to cDNA using High-Capacity cDNA  
302 Reverse Transcription Kit (Life Technologies) as per the manufacturer's protocol. RNA from  
303 sorted cells was isolated utilising the RNeasy Micro kit (Qiagen). Real-time PCR reactions  
304 were performed on a ViiA7 system (Life Technologies) with Taqman primer sets for *Hprt*,  
305 *Ccl4*, *Ccl5*, *Il1a*, *Il1b*, *Il6*, *Il10*, *Il12a*, *Il12b*, *Il23a* and *Tnf*. Gene expression was analysed  
306 using the comparative Ct ( $\Delta\Delta$ Ct) method and normalised against *Hprt* levels or *RPLPO* levels  
307 for mouse or human, respectively.

308

309 **RNA-Sequencing analysis.**

310 Libraries were sequenced on Illumina HiSeq4000 yielding > 40x10<sup>6</sup> 150 b.p. paired end reads  
311 per sample. These were mapped to the mm10 genome using STAR<sup>51</sup> with the options: "--  
312 runMode alignReads --outFilterMismatchNmax 2." Uniquely mapped read pairs were counted  
313 over annotated genes using featureCounts<sup>52</sup> with the options: "-T 18 -s 2 -Q 255." Differential  
314 expression was then analysed with DESeq2<sup>53</sup> and genes with fold changes > 2 and false  
315 discovery rates (FDRs) < 0.05 were deemed to be differentially expressed. Variance stabilised  
316 (VST) counts for all DESeq2 differentially expressed genes, likelihood ratio test, false  
317 discovery rates (FDRs) < 0.05, were used for dimensionality reduction. For direct comparisons

318 genes with fold changes > 2 and FDR < 0.05 were deemed to be differentially expressed. Gene  
319 set enrichment analysis was performed using one-sided Fisher's exact tests (as implemented in  
320 the 'gsfisher' R package <https://github.com/sansomlab/gsfisher/>). RNA sequencing data that  
321 support the findings of this study have been deposited in GEO with the accession code  
322 GSE141082.

323

324

325 **Measurement of cytokine production.** Mouse serum cytokine concentrations were analysed  
326 by ELISA (Mouse IL12p70, #DY419-05), and Cytometric Bead Array (IL6 #558301, IL1 $\beta$   
327 #560232, BD Biosciences) as per manufacturer's instructions. IL-1 $\beta$ , IL-6, and IL12p70  
328 concentration in Human biopsy or cell culture supernatants was measured by Cytometric  
329 Bead Array (IL1 $\beta$ #558279, IL6# 558276, IL12p70#558283). IL-10 concentration in human  
330 intestinal biopsy supernatants was measured by ELISA ( #DY217B-05, R&D systems).  
331 TNF $\alpha$  was measured in human monocyte-derived macrophage culture supernatants by ELISA  
332 (#DY210-05, R&D systems). All cytokine detection was performed according to  
333 manufacturer's instructions.

334

335 **Western blots.** Cells were lysed in 1% TX-100 lysis buffer (1% v/v TX-100, 10% v/v glycerol,  
336 1 mM EDTA, 150 mM NaCl, 50 mM Tris pH 7.8) supplemented with protease inhibitor  
337 cocktails (Roche). Lysates were incubated on ice for 30 min and cleared by centrifugation at  
338 13,000 rpm for 10 min at 4°C. Protein quantification was performed with the Qubit assay  
339 (Thermo Fisher Scientific) according to the manufacturer's protocol. 10  $\mu$ g of lysates were  
340 boiled in Laemmli sample buffer (Bio-Rad), resolved on a NUPAGE 4-12% Bis-Tris gel  
341 (Invitrogen), and transferred onto a PVDF membrane (GE Healthcare) by wet western blotting.  
342 Membranes were blotted for antibodies for IRF5 (ab21689, Abcam), PYK2 (3292, CST),

343 Phospho-Pyk2 Tyr402 (3291, CST), alpha-tubulin (3873, CST), Histone H3 (ab1791),  
344 GAPDH (ab9485, Abcam) and  $\beta$ -actin (A5441, Sigma), followed by HRP-conjugated  
345 secondary antibodies. Complexes were detected with the chemiluminescent substrate solution  
346 ECL (GE Healthcare).

347

348 **Subcellular fractionation.** Cell pellets were lysed in cytoplasmic lysis buffer (0.15 % NP-  
349 40, 10 mM Tris pH 7.5, 150 mM NaCl), incubated on ice for 10 minutes, and layered on top  
350 of cold sucrose buffer (10 mM Tris pH 7.5, 150 mM NaCl, 24 % w/v sucrose). The lysate  
351 was centrifuged at 13,000 rpm for 10 minutes at 4°C and the supernatant was collected as the  
352 cytosolic fraction. The nuclear pellet was lysed in RIPA buffer (150 mM NaCl, 1% NP-40,  
353 0.5% Na-DOC, 0.1 % SDS, 50 mM Tris pH 8.0) and sonicated on the Biorupter sonicator (10  
354 cycles of 30 seconds on/30 seconds off), followed by centrifugation at 13,000 rpm for 5  
355 minutes at 4°C. The supernatant was collected as the nuclear fraction.

356

357 **Immunoprecipitation.**  $1 \times 10^7$  million cells per immunoprecipitation were seeded and  
358 incubated overnight. Media was replaced with serum-free media for 1 hr, followed by LPS  
359 stimulation at indicated timepoints. Whole cell extracts were prepared with 1 % TX-100 lysis  
360 buffer as described above. Lysates were precleared with 100  $\mu$ L TrueBlot Anti-Rabbit Ig IP  
361 beads (eBioscience) by rotating. Samples were incubated with 2  $\mu$ g antibody for 2 hr, followed  
362 by 100  $\mu$ L IP beads (50% slurry) by rotating overnight. Immunoprecipitates were washed three  
363 times with IP wash buffer (1 % NP-40, 150 mM NaCl, 1 mM EDTA, 20 mM Tris-HCl, pH 8)  
364 and eluted by boiling the samples for Laemmli sample buffer (Bio-Rad). Eluates were collected  
365 from the beads by centrifugation and resolved on a NUPAGE 4-12 % Bis-Tris gel (Invitrogen).

366



367 **Generation of Pyk2 and IRF5 CRISPR knockouts.** 5,000 RAW264.7 cells/well were seeded  
368 in 96-well plates and infected the next day with PTK2B (ID:MM0000145196), and IRF5  
369 (ID:MM0000200177) lentiviral particles (pLV-U6g-EPCG) provided by Sigma. Cells were  
370 transduced at a multiplicity of infection (MOI) of 10 in medium containing polybrene (8  $\mu$ g  
371 mL<sup>-1</sup>) and spun at 1500 x g for 1 hr. After an overnight incubation, media was replaced with  
372 fresh media, and selected with 4  $\mu$ g mL<sup>-1</sup> puromycin (InvivoGen) for two weeks.

373 Hoxb8 macrophage progenitors were transduced with lentiCas9-v2 lentivirus targeting exon 2  
374 of Irf5 (ID: ENSMUSG00000029771, gRNA ACCCTGGCGCCATGCCACGAGG) and  
375 exon3 of PYK2 (ID: ENSMUSG00000059456, gRNA CCCTATTCGCCCCACTCAGG). The  
376 lentiCas9-v2 plasmid was a gift from Feng Zhang (Addgene plasmid #52961). Briefly, the  
377 lentiCas9-v2 lentivirus were produced from HEK-293FT cells transfected with the lentiCas9-  
378 v2 plasmid mixed at a 2:1:1 DNA ratio of the lentiviral packaging plasmids pMD2.G (Addgene  
379 plasmid #12259) and psPAX2 (Addgene plasmid #12260) at a 2:1:1 ratio. Media was replaced  
380 16 hours post-transfection. Two days post transfection, the lentivirus containing mediums were  
381 harvested, filtered and added onto Hoxb8 macrophage progenitor cells at a final concentration  
382 of 8 $\mu$ g/ml polybrene. Transduced cells were allowed to grow for additional four days and  
383 selected with 6 $\mu$ g/ml Puromycin for the targeted knockout of Irf5 and Pyk2.

384  
385 **Chromatin Immunoprecipitation.** 1x10<sup>7</sup> million cells per ChIP were seeded and incubated  
386 overnight. GM-BMDMs cells were pretreated with defactinib or DMSO vehicle for 1 hour,  
387 followed by LPS (100 ng/ml) for 2 hours. RAW264.7 cells were stimulated with LPS (500  
388 ng/ml) for 2 hours. Cells were fixed in formaldehyde, quenched with Tris pH 7.5 and washed  
389 in PBS. Nuclear lysates were isolated as previously described<sup>22</sup> and sonicated with a  
390 Bioruptor (Diagenode) for 8 cycles (GM-BMDMs) or 10 cycles (RAW264.7). Lysates were  
391 immunoprecipitated with 5  $\mu$ g of anti-IRF5 (ab21689; Abcam), anti-RNA Polymerase II

392 (MMS-128P; Biolegend), or Rabbit Anti-Mouse IgG (ab46540; Abcam). Immunoprecipitated  
393 DNA was purified with the PCR Purification Kit (Qiagen). qPCR analysis was carried out in  
394 duplicates and represented as % input. Primer sequences *Illa*  
395 (ACTTCTGGTGCTCATCTGTCATGTT, GCTCTATGGTTCCTGTGTCTGTAGG), *Ilib*  
396 (GGATGTGCGGAACAAAGGTAGGCACG, ACTCCAAGTCAAAGCTCCCTCAGC),  
397 *Ili6* (GAGAGAGGAGTGTGAGGCAGAGAGC, GGTTGTCACCAGCATCAGTCCCAAG),  
398 *Ili2b* (GCAAGGTAAGTTCTCTCCTCTTCCC, AATGACTATTTGAAGCCCCTGTCGT),  
399 TNF (GCTAAGTTCTTCCCCATGGATGTCCC,  
400 ACCCATTCTTCTCTGTCCTCCAGAGC).

401

402 **Kinase inhibitors screening and luciferase reporter assay.** RAW264.7 cells were seeded in  
403 eighteen 96-well plates at 50,000 cells/well a day before transfection as described above. 1hr  
404 prior to LPS treatment, cells were treated with 10uM of inhibitors in quadruplicates. For  
405 experiment wells (n=4 for each inhibitor set AG-AK, total amounts for 16 plates (AG-AJ1-4)  
406 – 80 wells per plate and 2 plates (AK1,2-3,4)– 96 wells per plate) 21 ml of Opti-Mem (Gibco)  
407 was mixed with DNA: 50 µg of pBent-HA-IRF5, 50 µg of pGL3-5'3'TNF-luc and 25 µg of  
408 pEAK8-Renilla, vectors described in <sup>21,54</sup>. 5ml of Opti-Mem mixed with 200 µl of Plus reagent  
409 was added to the DNA solution and incubated for 5-15 min. Then, 5ml of Opti-Mem was mixed  
410 with 500 µl of Lipofectamine LTX reagent, added to the DNA/Plus solution and incubated for  
411 30 min. For controls (amount for 4 plates – two 4 well-rows each), 800 µl of Opti-Mem was  
412 mixed with DNA: 2 µg of pBent-HA-IRF5 or pBent2-empty, 2 µg of pGL3-5'3'-TNF-luc and  
413 1 µg of pEAK8-Renilla. 200 µl of Opti-Mem mixed with 8 µl of Plus reagent was added to the  
414 DNA solution and incubated for 5-15 min. Then, 200 µl of Opti-Mem was mixed with 20 µl  
415 of Lipofectamine LTX reagent, added to the DNA/Plus solution and incubated for 30 min. To  
416 transfect cells, 20 µl of the DNA/transfection reagent mix was added per well. Next day, cells

417 were pre-incubated for 1 hr with 20  $\mu$ l of inhibitor (or 1% DMSO to control wells) in serum-  
418 free DMEM (final conc. 0.1, 1 or 10  $\mu$ M in 1% DMSO). Then, 1 $\mu$ g/ml of LPS was added to  
419 the cells and 6 hours later the culture medium was and the plate-bound cells were kept frozen  
420 (-20 C). Cells were lysed using the Dual-Glo Luciferase Assay kit (Promega) according to the  
421 manufacturer's protocol and analysed in a FLUOstar Omega microplate reader (BMG  
422 Labtech). Raw firefly luciferase activities (or values normalized against Renilla luciferase  
423 activities) in wells incubated with the kinase inhibitors were divided by the luciferase activity  
424 values in the control wells (DMSO vehicle only, cells expressing IRF5 and stimulated with  
425 LPS) and expressed as part of a whole or a percentage of IRF5 reporter activity (which was 1  
426 or 100% in cells treated with DMSO only).

427

#### 428 **Kinase assays.**

429 293 ET cells were plated at 250,000 cells/well in six-well plates and a day later were transfected  
430 with 1  $\mu$ g of pBent2-HA-IRF5 and 1  $\mu$ g of plasmid encoding one of the myc-tagged candidate  
431 IRF5 kinases (in the pEAK8-myc vector) using Lipofectamine2000<sup>TM</sup> (Life technologies)  
432 according to the manufacturers protocol. The cell lysates were subjected to kinase assays using  
433 a modification of an established protocol<sup>55</sup>. Cells were washed in PBS and lysed on the ice in  
434 kinase reaction buffer (20 mM HEPES pH 7.5, 137 mM NaCl, 0.5 mM EGTA, 25 mM MgCl<sub>2</sub>,  
435 0.2% Triton X-100, 10% Glycerol) with added protease (EDTA-free! complete-mini protease  
436 inhibitor cocktail, Roche, #11836170001) and phosphatase inhibitors (phosphatase inhibitor  
437 cocktail II, Sigma, #P5726). 2 mM of TCEP (#C4706, Sigma), 1mM of GTP (#G8877, Sigma)  
438 and 50  $\mu$ M S- $\gamma$ -ATP (ab138911, Abcam) was added sequentially to lysing samples. The  
439 reactions were mixed by vortexing and kept on a rocking surface for 1h at 37C. The reactions  
440 were stopped by adding 50 mM EDTA and moving them on ice. p-Nitrobenzyl mesylate  
441 (PNBM, ab138910, Abcam) was dissolved in DMSO to 50 mM. PNBM working solution was

442 prepared by adding 5  $\mu$ L of deionized water five times mixing after each addition to 25  $\mu$ L of  
443 the PNBM stock, and then was added 1/10 to kinase reactions (at 2.5 mM), which were further  
444 incubated for 2 hrs at room temperature. The bulk of the reactions were subjected to  
445 immunoprecipitations using anti-thiophosphate-ester antibody (1  $\mu$ g per reaction, ab92570,  
446 Abcam) and Protein G Sepharose 4 Fast Flow Media (#11524935, GE Healthcare) to pull-  
447 down phosphorylated IRF5. The rest of the reactions and the pull-downs were mixed with  
448 SDS PAGE loading buffer and subjected to SDS PAGE following Western blotting.

449

450 **Mass spectrometry analysis.** IRF5 was immunoprecipitated from LPS-stimulated WT and  
451 PYK2 KO RAW264.7 cells ( $5 \times 10^7$  cells) as described in immunoprecipitation section. Eluents  
452 were subjected to in-solution digestion as described previously<sup>56</sup>. In brief samples were  
453 reduced and alkylated before double precipitation with Chloroform/Methanol as described<sup>57</sup>.  
454 Protein pellets were resuspended in 50  $\mu$ L 6M urea for solubilisation. The samples were diluted  
455 to 1M Urea in 100mM Tris buffer for tryptic digest. Following overnight digestion, peptides  
456 were acidified with 3% Formic acid and desalted with solid phase extraction Sola cartridges  
457 (Thermo). Peptides were eluted with 600  $\mu$ L glycolic acid solution (1M glycolic acid, 80%  
458 acetonitrile, 5% trifluoroacetic acid). Phospho-peptide enrichment was performed using a TiO<sub>2</sub>  
459 protocol as described<sup>58</sup> with eluates from the Sola cartridges adjusted to 1 mL with 1M glycolic  
460 acid solution and incubated for 5 minutes with 50  $\mu$ L TiO<sub>2</sub> bead slurry solution. Bead washes  
461 (200  $\mu$ L) were carried out as previously described. In short, beads were sequentially washed  
462 with 200  $\mu$ L glycolic acid solution, ammonium acetate solution (100 mM ammonium acetate  
463 in 25% acetonitrile) and 10% acetonitrile solution repeated in triplicate. Phospho-peptides were  
464 eluted, following incubation for 5 minutes at room temperature with 50  $\mu$ L ammonia solution  
465 (5%) and centrifuged, this was repeated in triplicate. The three eluate fractions were combined  
466 and dried using a SpeedVac and pellets were stored at -80°C until analysis. For analysis by

467 nano-liquid chromatography tandem mass spectrometry (nLC-MS/MS), a Dionex UHPLC  
468 system coupled to an Orbitrap Fusion Lumos mass spectrometer was used as described  
469 previously<sup>59</sup>. Raw MS files were subjected to processing using PEAKS (version 8.5) software  
470 and searched against the UniProtSP Mus Musculus database. Searches included the data refine,  
471 denovo PEAKS and PEAKS PTM modes, the latter of which included phosphorylation on Ser  
472 (S), Thr (T) and Tyr (Y) residues. The proteomics data and MS raw files have been deposited  
473 to Proteome Xchange Consortium via the PRIDE<sup>60</sup> partner repository with the dataset identifier  
474 PXD014033 (<https://www.ebi.ac.uk/pride/archive/>).

475  
476 ***Helicobacter hepaticus*- induced colitis model.** Mice were free of known intestinal pathogens  
477 and negative for Helicobacter species. Animals from each experimental group were cohoused.  
478 On days 0, 1, and 2, mice were injected i.v. with 1 mg/kg defactinib or vehicle (5% DMSO,  
479 2.5% Solutol HS (Sigma), 2.5% absolute ethanol, 90% Dulbecco's PBS). Daily, starting from  
480 day 3, mice were injected i.p. with 5 mg/kg defactinib or vehicle. 30 minutes after the initial  
481 i.v. injection, mice were infected with  $1 \times 10^8$  colony forming units Hh on days 0 and 1 by oral  
482 gavage with a 22G curved, blunted needle (Popper & Sons). Mice were injected  
483 intraperitoneally once on day 0 with 1 mg anti-IL10R blocking antibody (clone 1B1.2).  
484 Infected mice were monitored daily for colitis symptoms. Mice were culled one week after day  
485 of infection, and organs were harvested for analysis.

486  
487 **Isolation of lamina propria leukocytes.** Colons and/or caeca were harvested from mice,  
488 washed in PBS/BSA and content flushed with forceps. Intestines were then opened  
489 longitudinally and washed once more before blotting to remove mucus. Gut tissue was then cut  
490 into 1 cm long pieces and placed in 50 mL centrifuge tube (Greiner) in ice cold PBS + 0.1%  
491 BSA. Colons were incubated 2 times at 200 rpm in 40 mL HBSS + 0.1% BSA + 1% Penicillin-

492 Streptomycin (PS, Lonza) + 5mM EDTA (Sigma-Aldrich) at 37 °C for 10 min before the  
493 supernatant was aspirated. Tissue was placed in 40 mL PBS + 0.1% BSA + 1% PS for 5 min.  
494 Intestines were then incubated with 20 mL RPMI + 10% FCS +1% PS + 2.5 U/mL Collagenase  
495 VIII (Sigma-Aldrich) + 2 U/mL DNase I (Roche), shaking at 200 rpm for 45 mins - 1 hour at  
496 37 °C. Supernatant was filtered through a 70 µm cell strainer to which 30 mL of ice cold PBS  
497 + 0.1% BSA + 1% PS + 5 mM EDTA was added to ablate collagenase/DNase activity. Cells  
498 were washed in 30 mL PBS/BSA before filtering once more through a 40 µm cell strainer. The  
499 cells were then pelleted by centrifugation at 400 rcf for 10 minutes at 4 °C and resuspended in  
500 1 mL RPMI + 10% FCS + 1% PS before counting.

501

502 **Flow cytometry.** CBA quantification of cytokine levels were performed on a FACSCanto II  
503 (BD) and analysed using Flowjo (Treestar Inc.). Acquisition of mouse samples was performed  
504 using either LSR II or Fortessa X20 flow cytometers with FACSDiva (BD), followed by  
505 analysis in Flowjo (Treestar Inc.). Gating strategy in **Fig. S8e**.

506

507 **Extracellular labelling of cells.**  $5 \times 10^5$  -  $2 \times 10^6$  cells were plated on U-bottom 96 well plates.  
508 Cells were washed twice with 150 µL FACS buffer (PBS + 0.1 % BSA + 1 mM EDTA + 0.01%  
509 Sodium Azide) at 400 rcf for 3 min 4°C. Cells were then Fc blocked for 10 min with  
510  $\alpha$ CD16/CD32 (BD) 1/100 in 20 µL FACS buffer at room temperature (RT) followed by  
511 washing once in 150 µL FACS buffer. Fixable Viability Dye eFluor®780 (ThermoFisher) and  
512 primary extracellular antibodies (Table 1.1) were added for 30 min at 4 °C in 20 µL FACS  
513 buffer in the dark. Labelled cells were then washed twice with 150 µL FACS buffer. Cells were  
514 then fixed for 30 mins in 50 µL Cytofix (BD), washed twice with 150 µL FACS buffer, and  
515 resuspended in 200 µL FACS buffer before acquisition.

516

| <b>Table.1.1 Antibodies used in flow cytometry analysis</b> |              |
|-------------------------------------------------------------|--------------|
| <b>Antigen</b>                                              | <b>Clone</b> |
| CD45                                                        | 30-F11       |
| CD11b                                                       | M1/70        |
| CD11c                                                       | N418         |
| Siglec F                                                    | E50-2440     |
| Ly6G                                                        | 1A8          |
| F4/80                                                       | BM8          |
| CD103                                                       | 2E7          |
| CD206                                                       | CO68L2       |
| MHC II                                                      | M5/114.15.2  |
| CD19                                                        | 6D5          |
| CD138                                                       | 281-2        |
| NK1.1                                                       | PK136        |
| CD3e                                                        | 145-2C11     |
| TCRgd                                                       | GL3          |
| Ter119                                                      | TER-119      |

517

518 **FACS sorting.** Colon lamina propria cells were prepared as described above. A small aliquot  
519 of each sample was stored in RNAlater (Sigma Aldrich) for further processing. Two to three  
520 samples were pooled in order to gain sufficient numbers for sorting. The cells were labelled as  
521 described above with the antibodies in Table 1.1, except no fixation step was performed.  
522 Labelled cells were washed twice with 1mL FACS buffer and resuspended in 500uL FACS  
523 buffer containing DNase I (10ug/mL, Roche). Sorting of the cells was performed into 500uL  
524 RNAlater on FACS Aria III (BD Biosciences) at the Kennedy Institute of Rheumatology FACS  
525 facility.

526 **Culture of UC patient colonic mucosal biopsies.** Intestinal pinch biopsies were obtained  
527 from Ulcerative Colitis patients registered in the Oxford IBD Cohort, attending the John  
528 Radcliffe Hospital Gastroenterology Unit (Oxford, UK). This cohort comprises 1896 patients  
529 with UC, median age 31 at diagnosis, treated with biological therapy (23%) or conventional  
530 steroids/immunomodulators (77%) for active disease, in addition to mesalazine. Biopsies  
531 were collected during routine endoscopy. Informed, written consent was obtained from all  
532 donors. Human experimental protocols were approved by the NHS Research Ethics System  
533 (Reference numbers: 16/YH/0247). Biopsies were washed in PBS and transferred into wells  
534 containing RPMI-1640 + 10% FCS + 20 µg/mL G418 (Thermo Fisher) + 20 U/mL Pen/Strep  
535 and cultured for 24 hours.

536

537 **UC biopsy viability assessment.** Biopsies were fixed in 4% PFA in PBS (#30525-89-4,  
538 Santa Cruz) for 24 hrs at RT and transferred to 70% ethanol. Fixed biopsies were then  
539 dehydrated and embedded in paraffin blocks, and 5 µm sections were cut. Embedding and  
540 sectioning of tissues was carried out by the Kennedy Institute of Rheumatology Histology  
541 Facility (University of Oxford). Viability of intestinal biopsies was measured by TACS®  
542 TdT *in situ* (Fluorescein) TUNEL assay (#4812-30-K, R&D systems) according to  
543 manufacturer's instructions. Sections were then mounted in Glycerol Mounting Medium with  
544 DAPI and DABCO (#ab188804, Abcam) and cover-slipped. Images of three non-sequential  
545 sections per sample were acquired. Three images per section were acquired at 20x  
546 magnification using a BX51 microscope (Olympus). To generate the apoptotic index, the  
547 total cell number was enumerated by counting DAPI<sup>+</sup>, and TUNEL(FITC)<sup>+</sup> cells in ImageJ,  
548 and calculating the percentage of total cells that were TUNEL<sup>+</sup>.

549



550 **Histopathological assessment.** Post-sacrifice, 0.5 cm pieces of caecum, and proximal, mid  
551 and distal colon were fixed in PBS + 4% paraformaldehyde (Sigma Aldrich). Fixed tissue  
552 was embedded in paraffin blocks, and sectioned using a microtome and stained with  
553 Haematoxylin and Eosin (H&E) by the Kennedy Institute of Rheumatology Histology  
554 Facility (Kennedy Institute of Rheumatology, University of Oxford). Sections were scored in  
555 a blinded manner by two researchers according to <sup>61</sup>.

556

557 **Cell viability.** 50,000 cells/well were seeded and incubated overnight. Cell viability was  
558 assessed using the Promega CellTiter-Glo® Luminescent kit per the manufacturers protocol  
559 and luminescence was measured in a FLUOstar Omega microplate reader (BMG Labtech).  
560 Samples were tested in triplicate and normalised to untreated wells.

561

562 **Protein isolation from colon tissue.** 1.5 ml Bioruptor Microtubes were filled with 250 mg of  
563 Protein Extraction Beads (Diagenode) and filled with RIPA buffer (supplemented with  
564 protease and phosphatase inhibitors). 10 mg of tissue was added to the tubes and vortexed  
565 briefly. Tubes were sonicated on the Biorupter Pico with 30 sec ON/30 sec OFF for 6 cycles  
566 at 4°C. After each 2 cycles, tubes were vortexed. The supernatant was transferred to a new tube  
567 and centrifuged at 13,000 rpm for 10 minutes at 4°C. The supernatant was transferred to a new  
568 tube and 80 µg of lysate was used for immunoblot analysis.

569

570

571

572 **Figure Legends**

573 **Figure 1. Small molecule library screening and in vitro validation of shortlisted candidate**  
574 **IRF5 kinases confirms Pyk2 as a positive hit.**

575 (a) The screening workflow showing the initial large screening in RAW264.7 cells, and the  
576 subsequent screens in RAW264.7 and 293 TLR4 cells. The top inhibitors were shortlisted  
577 based on their efficacy towards IRF5 reporter and low toxicity. Based on the known activities  
578 of these molecules against 221 kinases in the PKIS set, 34 kinases affected by the top inhibitors  
579 were shortlisted. The underlined kinases were previously proposed to target IRF5. (b) Impact  
580 of the kinases on the IRF5 reporter activity. Luciferase activities were measured in cells co-  
581 expressing IRF5 (or empty plasmid control, pBent2), TNF-luc reporter and one of the  
582 shortlisted kinases. Reporter activity was calculated as firefly luciferase activity normalised  
583 against constitutively expressed Renilla luciferase units and is shown as compared to the values  
584 in cells not expressing any kinase. (c) Binding of IRF5 to the shortlisted kinases. Myc-tagged  
585 kinases and HA-tagged IRF5 were co-expressed in 293 ET cells. Cell lysates were subjected  
586 to immunoprecipitation (IP) using anti-myc antibody and levels of kinases and IRF5 in the IP  
587 eluates and proteins were determined by Western blot. Asterisks indicates expected molecular  
588 weight. (d) *In vitro* kinase assays of 293 ET cells co-transfected with HA-IRF5 and myc- or  
589 flag-tagged kinases. Proteins in the pull-downs and lysates were detected by Western blotting  
590 using antibodies against HA- (IRF5) and myc- and FLAG- (kinases).

591

592 **Figure 2. PYK2 regulates IRF5 activation and IRF5-mediated transcription**

593 (a) Endogenous co-immunoprecipitation in RAW264.7 macrophages. Cells were stimulated  
594 with LPS for 10 minutes and immunoprecipitated with IRF5, PYK2 or an isotype control  
595 antibody. Immunoprecipitates were eluted from IP beads and proteins present in cell lysates  
596 (5% inputs) and eluates were detected by immunoblotting with antibodies against IRF5 or

597 PYK2. **(b)** Immunoblot of LPS-induced PYK2 tyrosine phosphorylation. Blots were probed  
598 with antibodies specific for PYK2 phosphorylated on Tyr-402, total PYK2 and GAPDH. **(c)**  
599 TNF-luc reporter activity in the absence or presence of ectopically expressed IRF5 in wild type  
600 and PYK2 KO RAW264.7 cells stimulated with LPS 6 hrs or left untreated. **(d)** IRF5 and pol  
601 II binding to *Il6* and *Il1a* gene promoter in resting or LPS-treated (2h, 500 ng/ml) wild type or  
602 PYK2 KO RAW264.7 cells as measured by the chromatin immunoprecipitation (ChIP)  
603 method. A non-specific IgG antibody was used as a negative control for ChIP. **(e)** *Il6* and *Il1a*  
604 mRNA induction in wild type, PYK2 KO or IRF5 KO RAW264.7 cells stimulated with LPS  
605 (500 ng/ml) for 0, 2, or 4 hrs. Gene expression was measured by qPCR. **(f)** Phosphorylation  
606 sites identified in LPS-stimulated WT and PYK2 KO RAW264.7 cells. **(g)** MS/MS spectrum of  
607 the IRF5 derived tryptic peptide 152-179 indicating phosphorylation at positions Y171.  
608 Fragmentation ions of the b- and y- series are indicated in blue and red, respectively. **(h)**  
609 Phospho-site inactivating mutations were introduced in IRF5 (human, isoform v2) in HEK-  
610 TLR4 cells and their effect on the TNF-luciferase reporter assay was measured in the absence  
611 or presence of PYK2. Reporter activity is expressed as firefly luciferase levels relative to  
612 Renilla levels and values are means of three independent experiments. **(i)** *In vitro* kinase assay  
613 and immunoblot of IRF5- site specific tyrosine mutants. HEKTLR4 cells were co-transfected  
614 with FLAG-IRF5 tyrosine mutants as indicated and Myc-PYK2. 10% lysate was kept for input  
615 and the remaining used for *in vitro* kinase reactions. Kinase assays were detected by western  
616 blot using antibodies against Flag-(IRF5) and Myc-(PYK2). All values in (c-e, h) are shown as  
617 mean values +/- SEM from n=3 experiments. Comparison by two-way ANOVA \* $P < 0.05$ ,  
618 \*\* $P < 0.01$ , \*\*\* $P < 0.001$ , and \*\*\*\* $P < 0.0001$ .

619

620

621

622 **Figure 3. Inhibitors of PYK2 suppress IRF5-dependent gene induction**

623 (a) TNF-luc reporter activity in the absence or presence of ectopically expressed IRF5 in wild  
624 type, IRF5 KO and PYK2 KO RAW264.7 cells pre-treated for 1 hr with 1  $\mu$ M of defactinib (or  
625 DMSO control) and then stimulated with 1  $\mu$ g/ml of LPS for 6 hrs or left untreated. Data are  
626 shown as means  $\pm$  SEM from n=3 experiments. Comparison by two-way ANOVA \*\*\* $P$ <0.001  
627 and \*\*\*\* $P$ <0.001. (b) RAW264.7 cells were fractionated into cytosolic and nuclear extracted  
628 following 1h pre-treatment with defactinib (1  $\mu$ M) and 2 hr stimulation with LPS (1  $\mu$ g/ml).  
629 (c) IRF5 and pol II binding to *Il6* and *Il1b* gene promoters in GM-CSF-differentiated mouse  
630 BMDMs pre-treated with 3.5  $\mu$ M defactinib (def) or DMSO control and further stimulated with  
631 LPS for 2 hrs. Chromatin recruitment was analysed by ChIP. Data are normalized against  
632 chromatin amount in lysates (and expressed as percentage of input for each gene) and shown as  
633 mean values  $\pm$  SEM from n=3 individual mice, each performed in duplicates. Comparison by  
634 one-way ANOVA \* $P$ <0.05, \*\* $P$ <0.01 with multiple test corrections by Tukey. (d) *Il6* and *Il1b*  
635 expression levels in GM-BMDMs pre-treated with 3.5  $\mu$ M defactinib (def) or DMSO control  
636 for 1 h, followed by LPS stimulation for 2 hrs. Data are shown as means  $\pm$  SEM for n=4  
637 individual mice and analysed by one-way ANOVA \* $P$ <0.05 and \*\*\* $P$ <0.001. (e) PCA analysis of  
638 RNA-seq data from WT and *Irf5*<sup>-/-</sup> pre-treated with 3.5  $\mu$ M defactinib (def) or DMSO control  
639 for 1 h and further stimulated with LPS for 0 or 2 hrs. (f) MA plots depicting effect of defactinib  
640 on LPS stimulated BMDMs from WT or IRF5<sup>-/-</sup> mice. Differentially expressed genes (fold  
641 change > 1 and padj < 0.05) are highlighted in red. (g) GO enrichment analysis for differentially  
642 expressed genes (as in f). (h) Correlation analysis of IRF5 and defactinib regulated genes after  
643 2 hrs LPS stimulation. Red indicates genes are differentially expressed (significance as in f) in  
644 both comparisons, genes regulated by IRF5 only (black), genes regulated by defactinib only  
645 (grey). Venn diagrams demonstrate overlap between IRF5 and defactinib regulated genes.

646 **Figure 4. PYK2 inhibition reduced inflammation in Hh/anti-IL10R-model of murine**  
647 **colitis and in UC biopsies.**

648 (a) H&E staining of large intestine tissue sections, (b) histology scoring and (c) leukocyte  
649 content from *Hh*/anti-IL10R-treated mice, which received either vehicle or defactinib.

650 (d) Cytokine/chemokine mRNA expression levels in mouse colon tissues from vehicle or  
651 defactinib *Hh*/anti-IL10R treated mice. Data from (b-d) are shown as means +/-SEM for n=6  
652 mice \* $P < 0.05$  and \*\* $P < 0.01$  by unpaired Student's t test. (E) Cytokine proteins levels in biopsies  
653 from ulcerative colitis patients from non-inflamed and inflamed tissues treated with defactinib  
654 at indicated concentrations per mg of tissue. Data are shown as means +/-SEM for n=10 human  
655 donors and analysed by two- way ANOVA where \* $P < 0.05$  and \*\* $P < 0.01$ .

656

657 **Supporting information**

658 **Source Data 1.** Reporter gene assays screening of GSK PKIS set for IRF5 activation inhibitors.

659

660 **Supplementary Figure 1. Screening and validation assays to identify novel IRF5 kinases**

661 TNF and ISRE-luc reporter activity in (a) HEK-TLR4 and (b) RAW264.7 cells co-expressing  
662 IRF5 or empty pBent2 plasmid control. Cells were stimulated with LPS (1 $\mu$ g/ml) for 6 hrs or  
663 left untreated. Data are shown as means +/- SEM for 3 independent experiments each  
664 performed in triplicates and analysed by two-way ANOVA where \* $P < 0.05$  and \*\*\*\* $P < 0.0001$ .

665 (c) A scheme of small molecule screening for candidate IRF5 kinases. RAW cells were  
666 transfected with plasmids encoding for IRF5 and TNF-luciferase reporter as well as  
667 constitutively expressed Renilla luciferase. (1) 24 hrs after transfection cells were pre-treated  
668 with a library of inhibitors (four replicate wells per inhibitor) for 1hr (2) and stimulated with  
669 1  $\mu$ g/mL of LPS for 6 hrs (3) before lysing cells for luminometry. (d) Stratification of the kinase  
670 inhibitors used in the screen based on the degree of IRF5 reporter inhibition. The numbers are

671 shown based on activities of the firefly luciferase reporter, raw values or normalised to Renilla  
672 luciferase activities to account for non-specific impact of cell viability. Out of 365 molecules,  
673 57 inhibited IRF5 reporter activity by 30-50%, 34 – 50-70%, 8 – 70-80%, 5 – 80-90% and 4  
674 by >90% (the normalised activity readout). (e) Activities of top 10 IRF5 reporter inhibitors are  
675 shown where the dataset was analysed based on raw firefly luciferase or normalised to Renilla  
676 values. The compounds indicated with numbers are in top 10 independently of normalisation.  
677 To calculate reporter activity luciferase values (raw or normalised to Renilla) in wells  
678 incubated with kinase inhibitors were divided by the luciferase activity values in the control  
679 wells (DMSO vehicle only, cells expressing IRF5 and stimulated with LPS). (f) A scheme of  
680 a modified-ATP based IRF5 kinase assay. Cells co-expressing HA-tagged IRF5 with either of  
681 the candidate kinases were lysed and incubated with S- $\gamma$ -ATP. The newly-produced phosphate  
682 groups were further labelled using a reaction with PNBM and the modified proteins were pulled  
683 down using anti-thiophosphate ester antibody. (g) Table summarising functional validation of  
684 candidate kinases related to Fig. 1b-d.

685

686 **Supplementary Figure 2. PYK2 regulates IRF5 activation and IRF5-mediated**  
687 **transcription.**

688 (a) Western blot analysis of PYK2 and IRF5 expression in RAW 264.7 cells transfected with  
689 control, PYK2 or IRF5 CRISPR-based knockout constructs. (b) Immunoblot analysis for  
690 restoring PYK2 expression in PYK2 deficient RAW264.7 cells. (c) TNF-luciferase reported  
691 activity in WT and PYK2 KO RAW264.7 cells co-transfected with pBent2-Empty, HA-IRF5,  
692 or Myc-PYK2 along with TNF-firefly Luc and pRLTK-Renilla Luc. Cells were stimulated with  
693 LPS (1  $\mu$ g/ml) or left untreated for a further 6 hrs. (d) IRF5 and pol II binding to *Tnf* gene  
694 promoter in resting or LPS-treated (2h, 500 ng/ml) wild type or PYK2 KO RAW264.7 cells as  
695 measured by the chromatin immunoprecipitation (ChIP) method. A non-specific IgG antibody

696 was used as a negative control for ChIP. Data are normalized against chromatin amount in lysates  
697 (and expressed as percentage of input for each gene). (e) Gene expression levels in wild type,  
698 PYK2 KO or IRF5 KO RAW264.7 cells stimulated with LPS (500 ng/ml) for 0, 2, or 4 hrs.  
699 Gene expression was measured by qPCR. All values in (c-e) are shown as mean values +/-  
700 SEM from n=3 experiments. Comparison by two-way ANOVA \* $P<0.05$ , \*\*  $P<0.01$ , \*\*\*  $P<0.001$ ,  
701 and \*\*\*\*  $P<0.0001$ .

702

703 **Supplementary Figure 3. PYK2 regulates IRF5-mediated transcription in macrophages.**

704 (a) Flow cytometry analysis of HoxB8 cells after 5 days of differentiation with GM-CSF. Day  
705 0 corresponds to cells prior to differentiation. (b) Western blot analysis of IRF5 and PYK2  
706 expression in Hoxb8 macrophage progenitors transfected with PYK2 or IRF5 CRISPR-based  
707 knockout constructs. (c) Gene expression levels in wild type, PYK2 KO or IRF5 KO HoxB8  
708 macrophages stimulated with LPS (100 ng/ml) 2 hrs. Gene expression was measured by qPCR.  
709 Values shown as mean values +/- SEM from n=3 experiments. Comparison by two-way ANOVA  
710 \* $P<0.05$ , \*\*  $P<0.01$ , \*\*\*  $P<0.001$ , and \*\*\*\*  $P<0.0001$ .

711

712 **Supplementary Figure 4. Mass spectrometry analysis detects PYK2-dependent**  
713 **phosphorylated sites in IRF5.**

714 (a) MS/MS spectra indicating mouse IRF5 S300, Y334, S445, S56, Y312, S172  
715 phosphorylation in LPS-stimulated WT and PYK2 KO cells. Fragmentation ions of the b- and  
716 y- series are indicated in blue and red, respectively. (b) Identification of endogenous IRF5  
717 phosphorylation sites by tandem mass spectrometry (MS/MS) in LPS-stimulated WT (top  
718 panel) and PYK2 KO (lower panel) RAW264.7 cells in which the peptides identified by LC-  
719 MS/MS are underlined by a blue line. Each line corresponds to a unique MS/MS spectrum.  
720 Post-translational modifications including cysteine carbamidomethylation (orange box) and

721 phosphorylation (red box) are indicated. The location of phosphorylated Tyr 171 (Y171) and  
722 Ser172 (S172) observed in WT IRF5 are marked in a red box. (c) IRF5 sites in mouse and  
723 equivalent position in human isoform 2.

724

725 **Supplementary Figure 5. Defactinib affects Pyk2 phosphorylation and IRF5-dependent**  
726 **gene expression at concentrations that do not affect cell viability.**

727 (a) Cell viability in RAW264.7 cells pre-treated with DMSO/Defactinib for 1 hr followed by  
728 LPS (1  $\mu$ g/mL) for 6 hrs. IC<sub>50</sub>, inhibitor concentration at which 50% decline in cell viability  
729 was observed compared to control (DMSO). (b) Immunoblot of lysates of RAW264.7 cells  
730 pretreated for 1 h with 1  $\mu$ M defactinib (def) or DMSO control, and stimulated with LPS (1  
731  $\mu$ g/mL) for 30 min. Blots were probed with Abs specific for PYK2 phosphorylated on Tyr-  
732 402, total PYK2 and GAPDH. (c) TNF-luc reporter activity in the absence or presence of  
733 ectopically expressed IRF5 in RAW264.7 cells pre-treated for 1 hr with defactinib (or DMSO  
734 control) at indicated concentrations followed by LPS (1ug/ml) for 6 hrs. (d) Gene expression  
735 levels in RAW264.7 cell pre-treated with defactinib (def) or DMSO control for 1 h, followed  
736 by LPS stimulation for 4 hrs. Data are shown as means +/-SEM for n=3 and analysed by one-way  
737 ANOVA. (e) TNF-luc reporter activity in the absence or presence of ectopically expressed  
738 IRF5 in wild type, IRF5 KO and PYK2 KO RAW264.7 cells pre-treated for 1 hr with defactinib  
739 (Def), PF-573228 (PF) inhibitor or DMSO control at indicated concentrations and stimulated  
740 with LPS (1  $\mu$ g/ml) for a further 6 hrs. (f) WT and PYK2 KO RAW264.7 cells were pre-treated  
741 with 1  $\mu$ M of defactinib (Def) or DMSO vehicle control for 1 h followed by LPS (500 ng/ml)  
742 at indicated timepoints. Cell lysates were subjected for immunoblot using indicated antibodies.  
743 (g) NFkB-luc reporter activity in HEK-TLR4 cells co-expressing IRF5 or empty pBent2  
744 plasmid control. Cells were pretreated with defactinib (1 $\mu$ M) or DMSO control for 1 hr and  
745 stimulated with LPS (1 $\mu$ g/ml) for 6 hrs. Data for (c), (e) and (g) are shown as means +/- SEM



746 of three independent experiments, and analysed by 2 way ANOVA. \*\*\* $P < 0.001$  and  
747 \*\*\*\* $P < 0.0001$ .

748

749 **Supplementary Figure 6. Defactinib affects IRF5-dependent gene expression**

750 **(a)** Cell viability in GM-BMDMs pre-treated with DMSO/Defactinib for 1 hr followed by LPS  
751 (100 ng/ml) for 2 hrs. **(b)** Gene expression levels in GM-BMDMs pre-treated with 3.5  $\mu\text{M}$   
752 defactinib (def) or DMSO control for 1 h, followed by LPS (100 ng/ml) or **(c)** WGP (100  
753 ug/ml) for 2 hrs. Data are shown as means  $\pm$  SEM for  $n=4$  individual mice and analysed by one-  
754 way ANOVA \* $P < 0.05$ , \*\* $P < 0.01$ , and \*\*\* $P < 0.001$ . **(d)** Number of DE genes from RNA-seq.

755

756 **Supplementary Figure 7. Defactinib affects gene expression in human monocyte-derived**  
757 **macrophages.**

758 **(a)** Cell viability was measured in human monocyte-derived macrophages (hMDMs) after 3hrs  
759 or 24 hrs of treatment with defactinib. **(b)** Cytokine mRNA expression levels in human  
760 monocyte-derived macrophages pre-treated with defactinib (def, 5  $\mu\text{M}$ ) for 1 h followed by LPS  
761 stimulation (100 ng/ml) for 2 h. Data are shown as means  $\pm$  SEM for  $n=4$  and analysed by one-  
762 way ANOVA where \*\* $P < 0.01$  and \*\*\* $P < 0.001$ . **(c)** Cytokine proteins levels in human  
763 monocyte-derived macrophages pre-treated with various amounts of defactinib for 1h,  
764 followed by stimulation with LPS for 24 h.

765

766 **Supplementary Figure 8. PYK2 inhibition in Hh/anti-IL10R-model of murine colitis.**

767 **(a)** Defactinib treatment regime during the initiation phase of mouse Hh+anti-IL-10R colitis.  
768 **(b)** Immune cell infiltrate from Hh/anti-IL10R-treated mice, which received either vehicle or  
769 defactinib. **(c)** PYK2 autophosphorylation (pY402) in vehicle or defactinib treated mice (6  
770 mice each) assessed by western blot analysis. Lysates from LPS stimulated GM-BMDMs

771 included as a positive control. (d) Gene expression levels in colon tissue, leukocytes,  
772 monocytes/macrophages from vehicle or defactinib Hh/anti-IL10R treated mice. (e) Gating  
773 strategy for (b). Data in (b) and (d) are shown as means +/-SEM. \* $P < 0.05$  and \*\* $P < 0.01$  by  
774 unpaired Student t test.

775

#### 776 **Supplementary Figure 9. PYK2 inhibition in UC biopsies.**

777 (a) Defactinib treatment of human biopsies from inflamed and non-inflamed sites of patients  
778 with ulcerative colitis. (b) Cell viability by TUNEL assay was measured in colon biopsies after  
779 24 hr treatment with defactinib.

780

#### 781 **Supplementary Figure 10. Proposed model of IRF5 activation by PYK2 in macrophages.**

782 LPS stimulation of TLR4 leads to PYK2 autophosphorylation on site Y402. Activated PYK2  
783 phosphorylates IRF5 at site Y171 (mouse). IRF5 translocates to the nucleus and activates target  
784 genes. Serine kinases IRAK4, TAK1, and IKK $\beta$  have been proposed to phosphorylate and  
785 activate IRF5 downstream of the TLR-MyD88 pathway<sup>12-15</sup>, while IKK $\alpha$  and Lyn negatively  
786 regulated IRF5<sup>19,62</sup>. Dectin-1 stimulation by whole glucan particles also leads to IRF5 mediated  
787 transcription and is likely to be Syk-dependent.

788

789

790

791

792

793

794

795

796

797

798 **References**

- 799 1. Jostins, L. *et al.* Host-microbe interactions have shaped the genetic architecture of  
800 inflammatory bowel disease. *Nature* **491**, 119–24 (2012).
- 801 2. Huang, H. *et al.* Fine-mapping inflammatory bowel disease loci to single-variant  
802 resolution. *Nature* **547**, 173–178 (2017).
- 803 3. Smillie, C. S. *et al.* Intra- and Inter-cellular Rewiring of the Human Colon during  
804 Ulcerative Colitis. *Cell* **178**, 714-730.e22 (2019).
- 805 4. Krausgruber, T. *et al.* IRF5 promotes inflammatory macrophage polarization and TH1-  
806 TH17 responses. *Nat. Immunol.* **12**, 231–238 (2011).
- 807 5. Takaoka, A. *et al.* Integral role of IRF-5 in the gene induction programme activated by  
808 Toll-like receptors. *Nature* **434**, 243–9 (2005).
- 809 6. Yang, L., Feng, D., Bi, X., Stone, R. C. & Barnes, B. J. Monocytes from *Irf5*<sup>-/-</sup> mice  
810 have an intrinsic defect in their response to pristane-induced lupus. *J. Immunol.* **189**,  
811 3741–50 (2012).
- 812 7. GTEx Consortium *et al.* Genetic effects on gene expression across human tissues.  
813 *Nature* **550**, 204–213 (2017).
- 814 8. Pandey, S. P., Yan, J., Turner, J. R. & Abraham, C. Reducing IRF5 expression  
815 attenuates colitis in mice, but impairs the clearance of intestinal pathogens. *Mucosal*  
816 *Immunol.* **12**, 874–887 (2019).
- 817 9. Corbin, A. L. *et al.* IRF5 promotes intestinal inflammation by guiding monocyte  
818 differentiation towards a pathogenic CD11c<sup>+</sup> macrophage phenotype. *bioRxiv* 601963  
819 (2019) doi:10.1101/601963.
- 820 10. Ryzhakov, G., Eames, H. L. & Udalova, I. a. Activation and Function of Interferon  
821 Regulatory Factor 5. *J. Interf. Cytokine Res.* **35**, 71–78 (2015).

- 822 11. Chang Foreman, H.-C., Van Scoy, S., Cheng, T.-F. & Reich, N. C. Activation of  
823 interferon regulatory factor 5 by site specific phosphorylation. *PLoS One* **7**, e33098  
824 (2012).
- 825 12. Cushing, L. *et al.* IRAK4 kinase activity controls Toll-like receptor-induced  
826 inflammation through the transcription factor IRF5 in primary human monocytes. *J.*  
827 *Biol. Chem.* **292**, 18689–18698 (2017).
- 828 13. Bergstrom, B. *et al.* TLR8 Senses Staphylococcus aureus RNA in Human Primary  
829 Monocytes and Macrophages and Induces IFN- Production via a TAK1-IKK -IRF5  
830 Signaling Pathway. *J. Immunol.* **195**, doi:10.4049/jimmunol.1403176 (2015).
- 831 14. Lopez-Pelaez, M. *et al.* Protein kinase IKK $\beta$ -catalyzed phosphorylation of IRF5 at  
832 Ser462 induces its dimerization and nuclear translocation in myeloid cells. *Proc. Natl.*  
833 *Acad. Sci. U. S. A.* **111**, 17432–7 (2014).
- 834 15. Ren, J., Chen, X. & Chen, Z. J. IKK $\beta$  is an IRF5 kinase that instigates inflammation.  
835 *Proc. Natl. Acad. Sci. U. S. A.* **111**, 17438–43 (2014).
- 836 16. Lin, R., Yang, L., Arguello, M., Penafuerte, C. & Hiscott, J. A CRM1-dependent  
837 nuclear export pathway is involved in the regulation of IRF-5 subcellular localization.  
838 *J. Biol. Chem.* **280**, 3088–95 (2005).
- 839 17. Zhao, Y. *et al.* Microbial recognition by GEF-H1 controls IKK $\epsilon$  mediated activation of  
840 IRF5. *Nat. Commun.* **10**, 1349 (2019).
- 841 18. Balkhi, M. Y., Fitzgerald, K. A. & Pitha, P. M. IKK $\alpha$  negatively regulates IRF-5  
842 function in a MyD88–TRAF6 pathway. *Cell. Signal.* **22**, 117–127 (2010).
- 843 19. Ban, T. *et al.* Lyn Kinase Suppresses the Transcriptional Activity of IRF5 in the TLR-  
844 MyD88 Pathway to Restrain the Development of Autoimmunity. *Immunity* (2016)  
845 doi:10.1016/j.immuni.2016.07.015.
- 846 20. Okigaki, M. *et al.* Pyk2 regulates multiple signaling events crucial for macrophage

- 847 morphology and migration. *Proc. Natl. Acad. Sci. U. S. A.* **100**, 10740–5 (2003).
- 848 21. Krausgruber, T. *et al.* IRF5 is required for late-phase TNF secretion by human  
849 dendritic cells. *Blood* **115**, 4421–4430 (2010).
- 850 22. Saliba, D. G. *et al.* IRF5:RelA interaction targets inflammatory genes in macrophages.  
851 *Cell Rep.* **8**, 1308–17 (2014).
- 852 23. Dranchak, P. *et al.* Profile of the GSK published protein kinase inhibitor set across  
853 ATP-dependent and-independent luciferases: implications for reporter-gene assays.  
854 *PLoS One* **8**, e57888 (2013).
- 855 24. Cheng, T.-F. *et al.* Differential Activation of IFN Regulatory Factor (IRF)-3 and IRF-5  
856 Transcription Factors during Viral Infection. *J. Immunol.* **176**, (2006).
- 857 25. Pandey, A. K. *et al.* NOD2, RIP2 and IRF5 Play a Critical Role in the Type I  
858 Interferon Response to Mycobacterium tuberculosis. *PLoS Pathog.* **5**, e1000500  
859 (2009).
- 860 26. Liu, J. Z. *et al.* Association analyses identify 38 susceptibility loci for inflammatory  
861 bowel disease and highlight shared genetic risk across populations. *Nat. Genet.* **47**,  
862 979–986 (2015).
- 863 27. Fairfax, B. P. *et al.* Innate immune activity conditions the effect of regulatory variants  
864 upon monocyte gene expression. *Science* **343**, 1246949 (2014).
- 865 28. Xi, C.-X., Xiong, F., Zhou, Z., Mei, L. & Xiong, W.-C. PYK2 interacts with MyD88  
866 and regulates MyD88-mediated NF-kappaB activation in macrophages. *J. Leukoc.*  
867 *Biol.* **87**, 415–23 (2010).
- 868 29. AR, A., M, C., EF, T. & RK, G. The tyrosine kinase Pyk2 mediates  
869 lipopolysaccharide-induced IL-8 expression in human endothelial cells. *J. Immunol.*  
870 **180**, 5636–5644 (2008).
- 871 30. Wang, G. G. *et al.* Quantitative production of macrophages or neutrophils ex vivo

- 872 using conditional Hoxb8. *Nat. Methods* 2006 34 **3**, 287–293 (2006).
- 873 31. Massimino, M. *et al.* IRF5 is a target of BCR-ABL kinase activity and reduces CML  
874 cell proliferation. *Carcinogenesis* **35**, 1132–1143 (2014).
- 875 32. Lipinski, C. A. & Loftus, J. C. Targeting Pyk2 for therapeutic intervention. *Expert*  
876 *Opin. Ther. Targets* **14**, 95–108 (2010).
- 877 33. Müller, S. *et al.* Donated chemical probes for open science. *Elife* **7**, (2018).
- 878 34. Lin, H.-M. *et al.* Effect of FAK inhibitor VS-6063 (defactinib) on docetaxel efficacy in  
879 prostate cancer. *Prostate* (2018) doi:10.1002/pros.23476.
- 880 35. Patel, M. R. *et al.* Abstract A69: Phase 1/1b study of the FAK inhibitor defactinib (VS-  
881 6063) in combination with weekly paclitaxel for advanced ovarian cancer. *Mol.*  
882 *Cancer Ther.* **12**, A69–A69 (2013).
- 883 36. Slack-Davis, J. K. *et al.* Cellular Characterization of a Novel Focal Adhesion Kinase  
884 Inhibitor. *J. Biol. Chem.* **282**, 14845–14852 (2007).
- 885 37. Kuprash, D. V *et al.* Similarities and differences between human and murine TNF  
886 promoters in their response to lipopolysaccharide. *J. Immunol.* **162**, 4045–52 (1999).
- 887 38. del Fresno, C. *et al.* Interferon- $\beta$  production via Dectin-1-Syk-IRF5 signaling in  
888 dendritic cells is crucial for immunity to *C. albicans*. *Immunity* **38**, 1176–86 (2013).
- 889 39. Kullberg, M. C. *et al.* IL-23 plays a key role in *Helicobacter hepaticus*-induced T cell-  
890 dependent colitis. *J. Exp. Med.* **203**, 2485–94 (2006).
- 891 40. Weiss, M. *et al.* IRF5 controls both acute and chronic inflammation. *Proc. Natl. Acad.*  
892 *Sci.* **112**, 11001–11006 (2015).
- 893 41. West, N. R. *et al.* Oncostatin M drives intestinal inflammation and predicts response to  
894 tumor necrosis factor–neutralizing therapy in patients with inflammatory bowel  
895 disease. *Nat. Med.* **23**, 579–589 (2017).
- 896 42. Zhao, M., Finlay, D., Zharkikh, I. & Vuori, K. Novel Role of Src in Priming Pyk2

- 897            Phosphorylation. *PLoS One* **11**, e0149231 (2016).
- 898    43.    Wu, S. S., Jácamo, R. O., Vong, S. K. & Rozengurt, E. Differential regulation of Pyk2  
899            phosphorylation at Tyr-402 and Tyr-580 in intestinal epithelial cells: roles of calcium,  
900            Src, Rho kinase, and the cytoskeleton. *Cell. Signal.* **18**, 1932–40 (2006).
- 901    44.    Kelly, E. K., Wang, L. & Ivashkiv, L. B. Calcium-activated pathways and oxidative  
902            burst mediate zymosan-induced signaling and IL-10 production in human  
903            macrophages. *J. Immunol.* **184**, 5545–52 (2010).
- 904    45.    Barnes, B. J., Kellum, M. J., Field, A. E. & Pitha, P. M. Multiple regulatory domains  
905            of IRF-5 control activation, cellular localization, and induction of chemokines that  
906            mediate recruitment of T lymphocytes. *Mol. Cell. Biol.* **22**, 5721–40 (2002).
- 907    46.    Chen, W. *et al.* Insights into interferon regulatory factor activation from the crystal  
908            structure of dimeric IRF5. *Nat. Struct. Mol. Biol.* **15**, 1213–20 (2008).
- 909    47.    Shimizu, T. *et al.* A first-in-Asian phase 1 study to evaluate safety, pharmacokinetics  
910            and clinical activity of VS-6063, a focal adhesion kinase (FAK) inhibitor in Japanese  
911            patients with advanced solid tumors. *Cancer Chemother. Pharmacol.* **77**, 997–1003  
912            (2016).
- 913    48.    Duffau, P. *et al.* Promotion of Inflammatory Arthritis by Interferon Regulatory Factor  
914            5 in a Mouse Model. *Arthritis Rheumatol. (Hoboken, N.J.)* **67**, 3146–57 (2015).
- 915    49.    Seneviratne, A. N. *et al.* Interferon Regulatory Factor 5 Controls Necrotic Core  
916            Formation in Atherosclerotic Lesions by Impairing Efferocytosis. *Circulation* **136**,  
917            1140–1154 (2017).
- 918    50.    Liao, M. *et al.* The landscape of lung bronchoalveolar immune cells in COVID-19  
919            revealed by single-cell RNA sequencing. *medRxiv* 2020.02.23.20026690 (2020)  
920            doi:10.1101/2020.02.23.20026690.
- 921    51.    Dobin, A. *et al.* STAR: ultrafast universal RNA-seq aligner. *Bioinformatics* **29**, 15–21

- 922 (2013).
- 923 52. Liao, Y., Smyth, G. K. & Shi, W. featureCounts: an efficient general purpose program  
924 for assigning sequence reads to genomic features. *Bioinformatics* **30**, 923–930 (2014).
- 925 53. Love, M. I., Huber, W. & Anders, S. Moderated estimation of fold change and  
926 dispersion for RNA-seq data with DESeq2. *Genome Biol.* **15**, 550 (2014).
- 927 54. Ryzhakov, G. *et al.* Cross-species analysis reveals evolving and conserved features of  
928 the nuclear factor  $\kappa$ B (NF- $\kappa$ B) proteins. *J. Biol. Chem.* **288**, 11546–54 (2013).
- 929 55. Carlson, S. M. & White, F. M. Labeling and identification of direct kinase substrates.  
930 *Sci. Signal.* **5**, pl3 (2012).
- 931 56. Fischer, R. & Kessler, B. M. Gel-aided sample preparation (GASP)--a simplified  
932 method for gel-assisted proteomic sample generation from protein extracts and intact  
933 cells. *Proteomics* **15**, 1224–9 (2015).
- 934 57. Wessel, D. & Flügge, U. I. A method for the quantitative recovery of protein in dilute  
935 solution in the presence of detergents and lipids. *Anal. Biochem.* **138**, 141–3 (1984).
- 936 58. Montoya, A., Beltran, L., Casado, P., Rodríguez-Prados, J.-C. & Cutillas, P. R.  
937 Characterization of a TiO<sub>2</sub> enrichment method for label-free quantitative  
938 phosphoproteomics. *Methods* **54**, 370–8 (2011).
- 939 59. Davis, S. *et al.* Expanding Proteome Coverage with CHarge Ordered Parallel Ion  
940 aNalysis (CHOPIN) Combined with Broad Specificity Proteolysis. *J. Proteome Res.*  
941 **16**, 1288–1299 (2017).
- 942 60. Vizcaíno, J. A. *et al.* 2016 update of the PRIDE database and its related tools. *Nucleic*  
943 *Acids Res.* **44**, D447–D456 (2016).
- 944 61. Izcue, A. *et al.* Interleukin-23 restrains regulatory T cell activity to drive T cell-  
945 dependent colitis. *Immunity* **28**, 559–70 (2008).
- 946 62. Balkhi, M. Y., Fitzgerald, K. A. & Pitha, P. M. IKK $\alpha$  negatively regulates IRF-5



947 function in a MyD88–TRAF6 pathway. *Cell. Signal.* **22**, 117–127 (2010).

948

# Figure 1

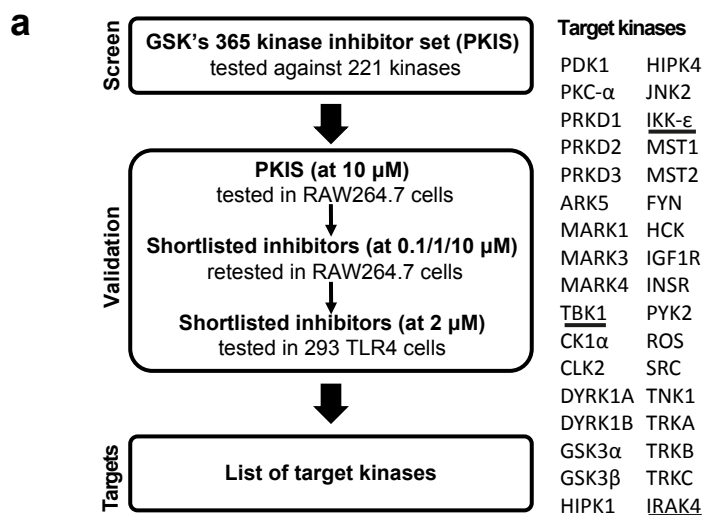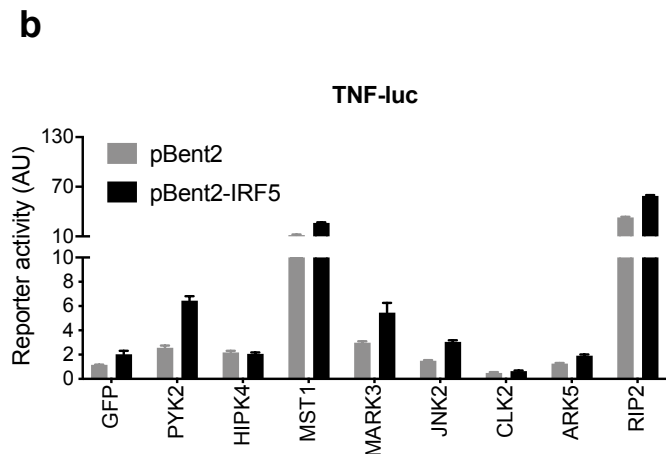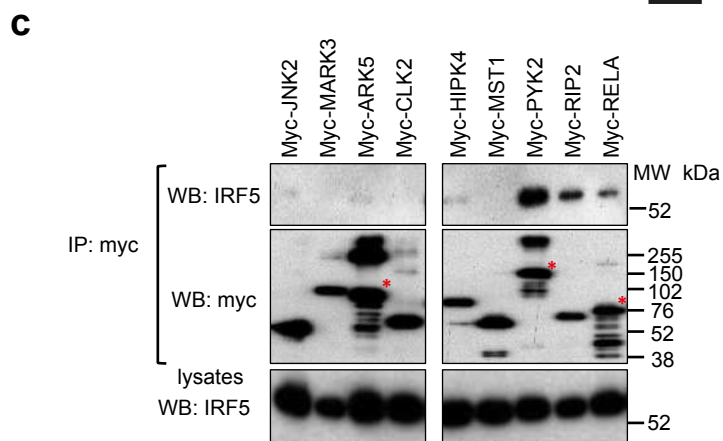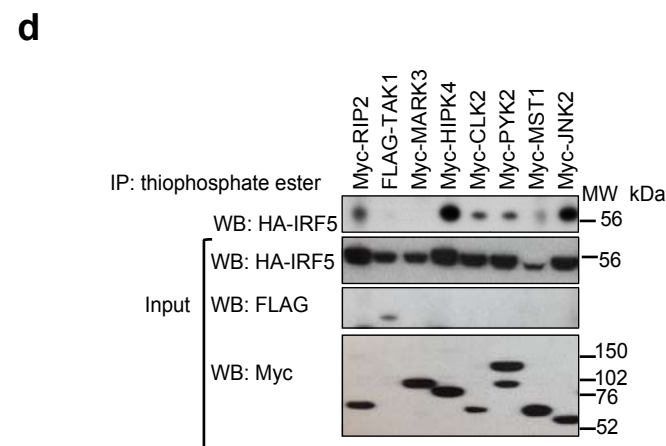

## Figure 2

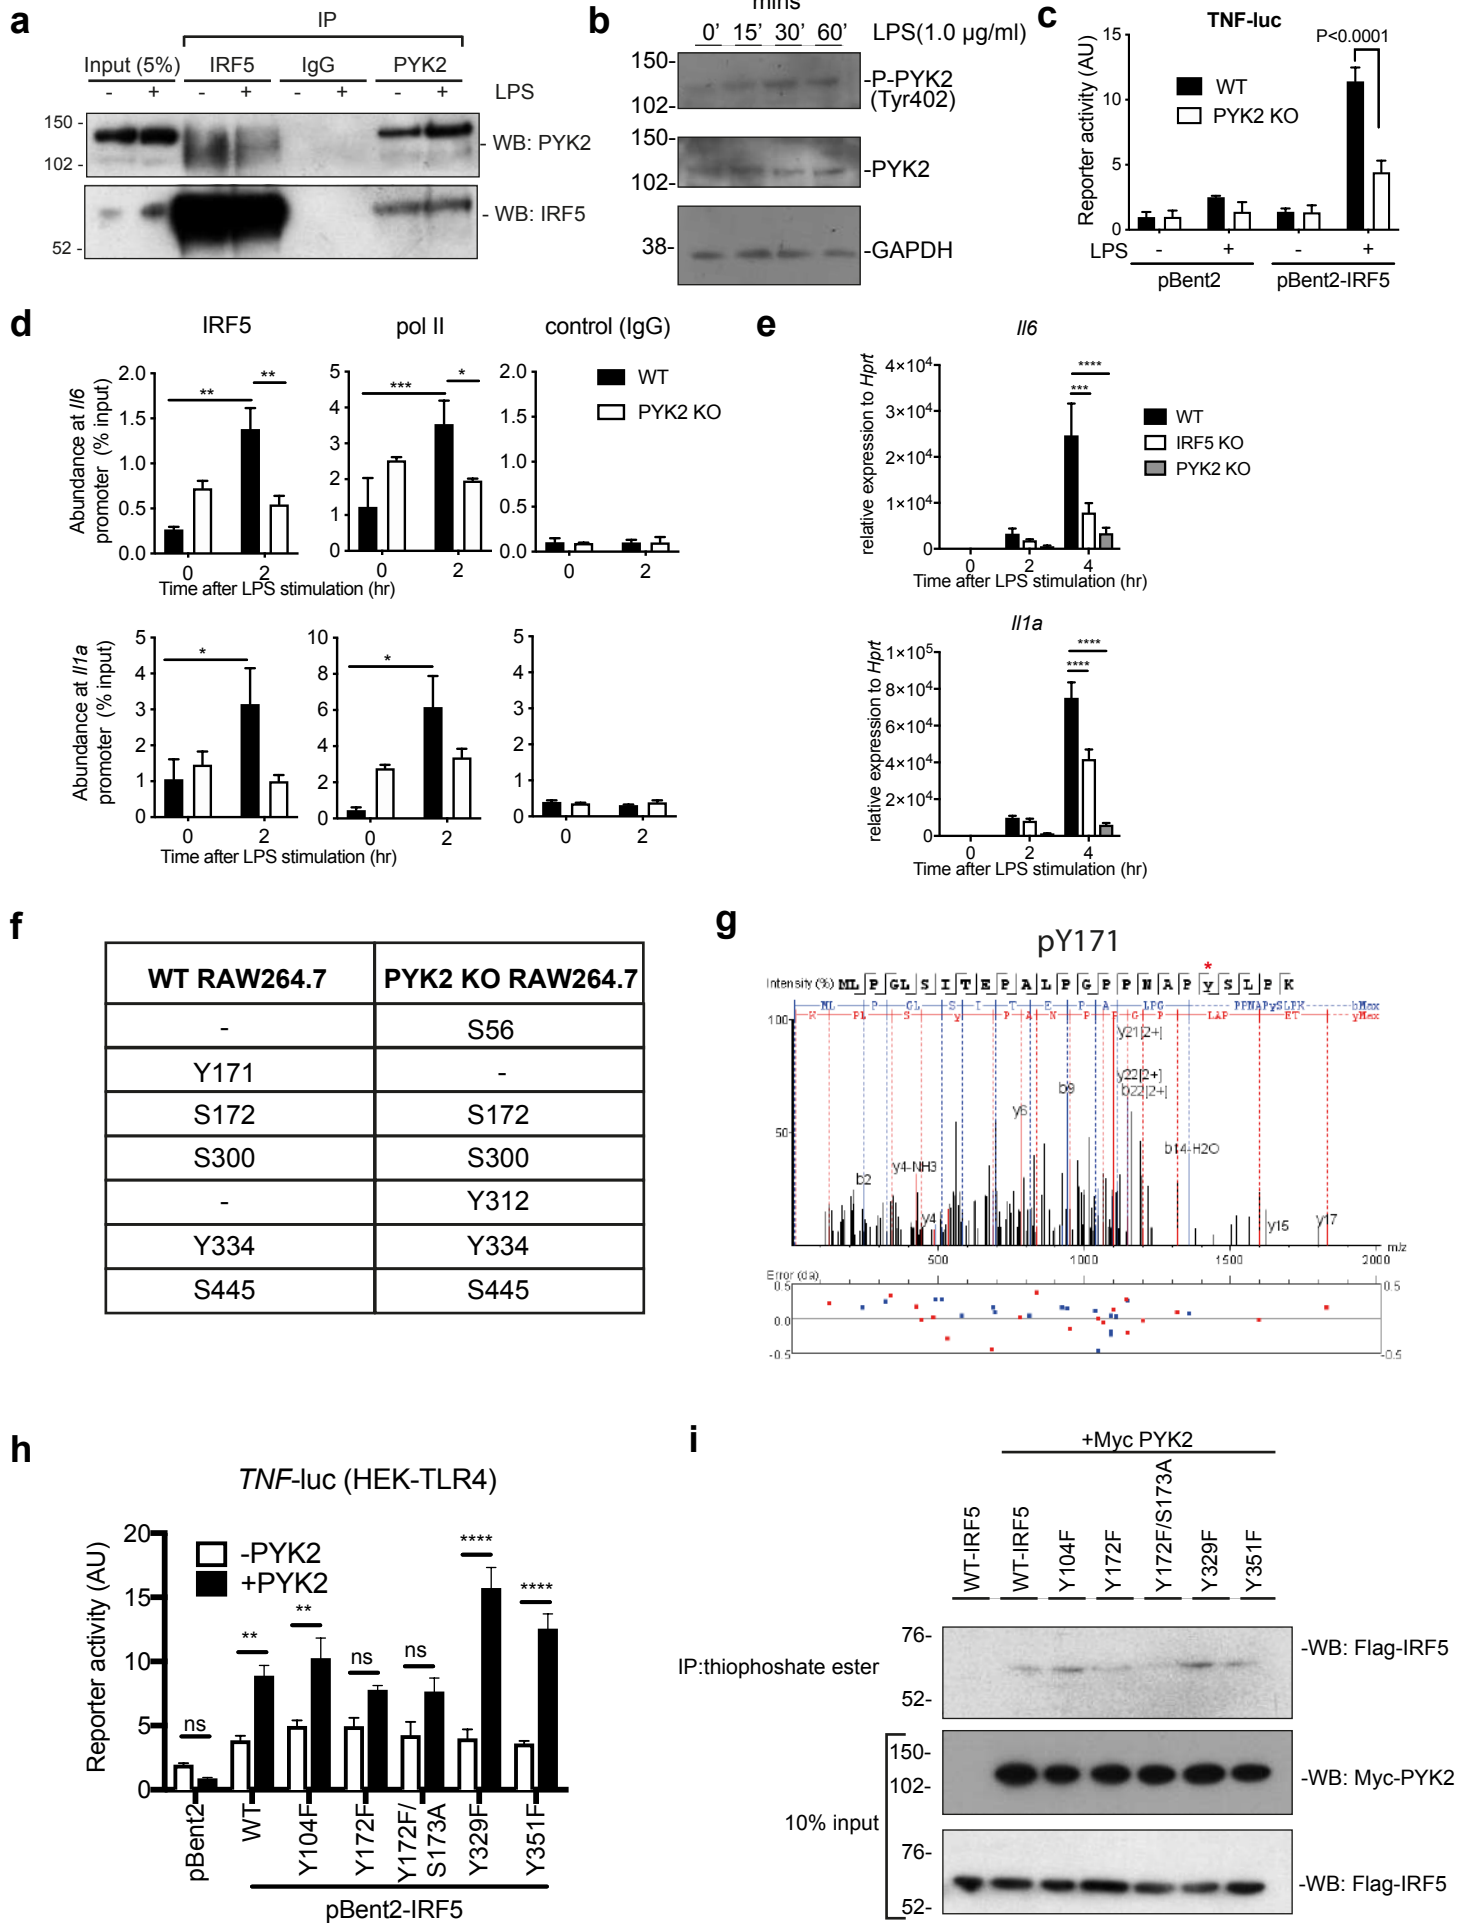

**a**

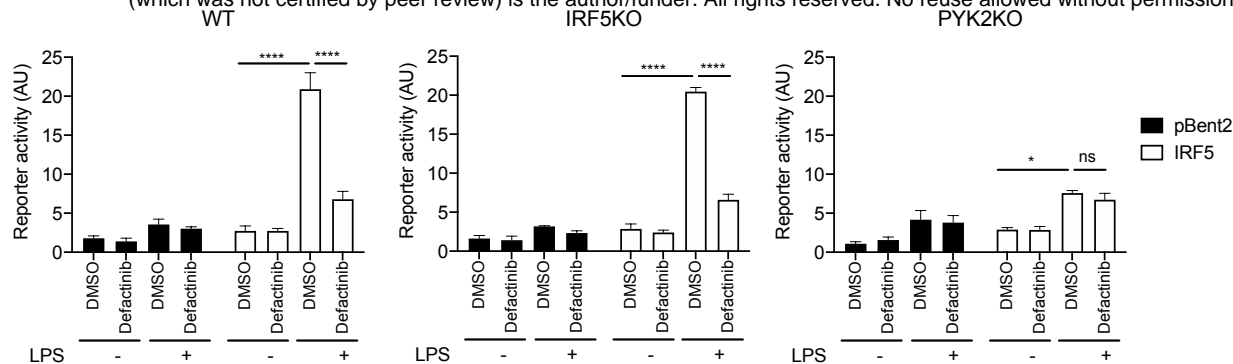

**b**

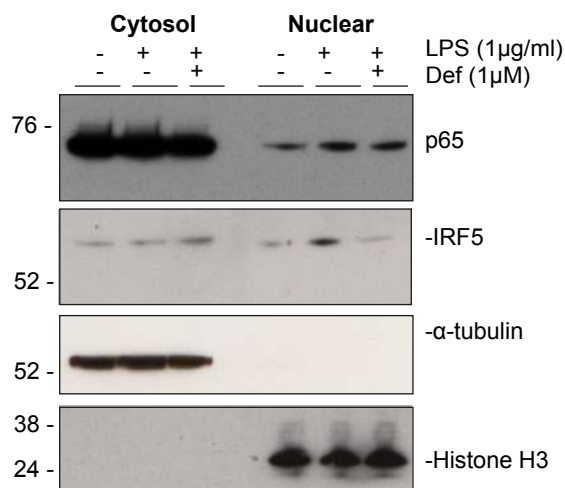

**c**

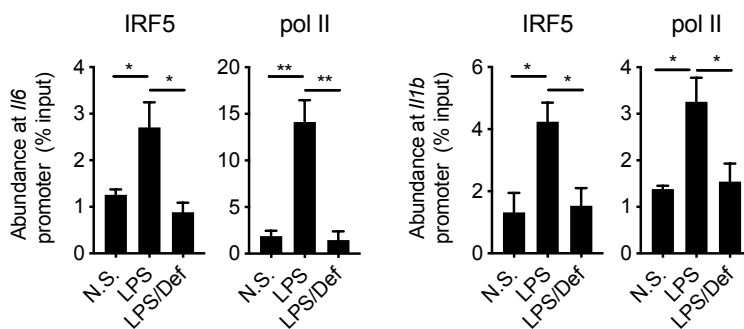

**d**

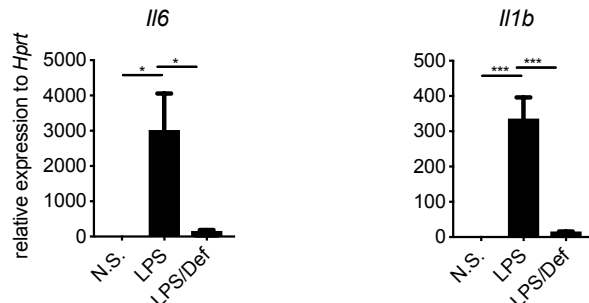

**e**

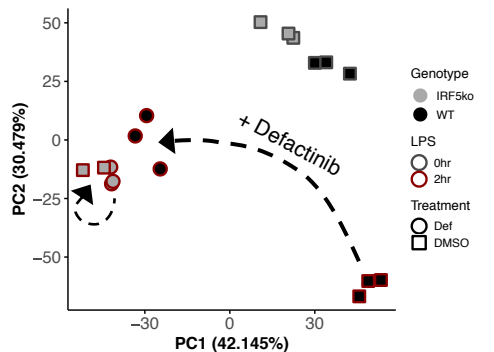

**f**

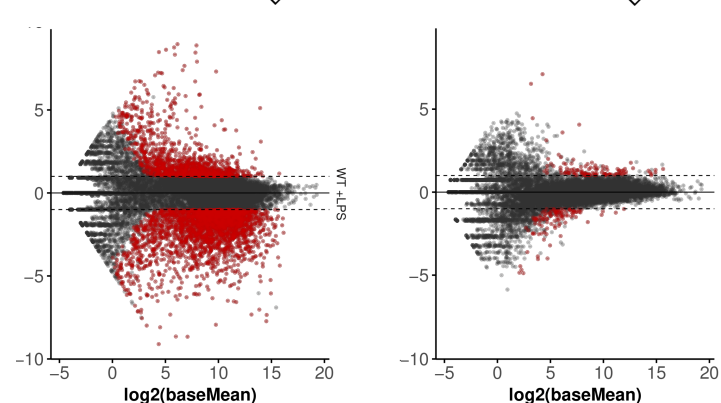

**g**

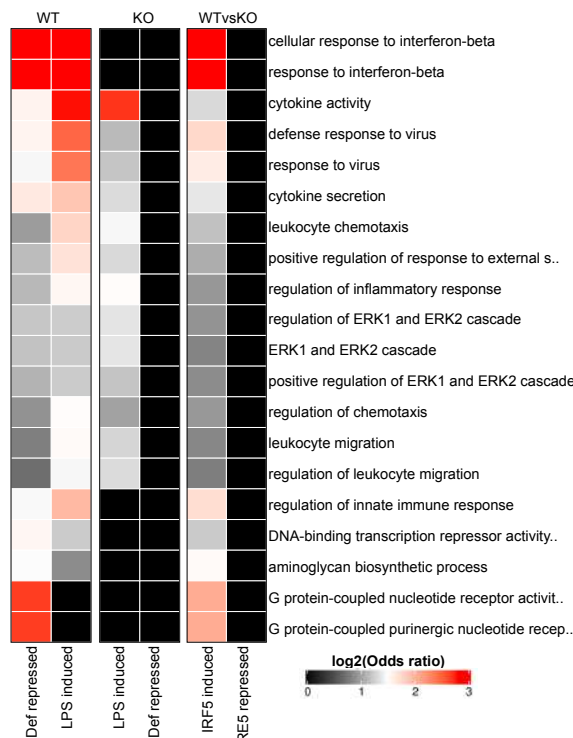

**h**

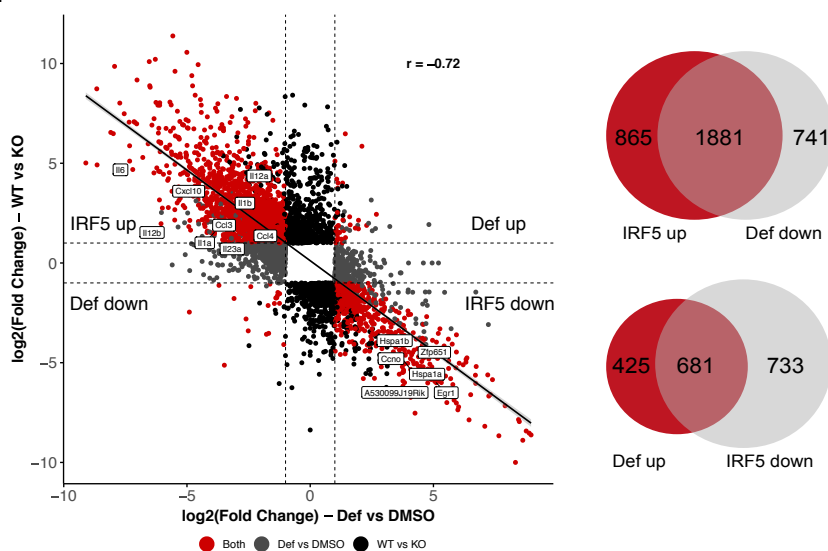

**Figure 4**

**a**

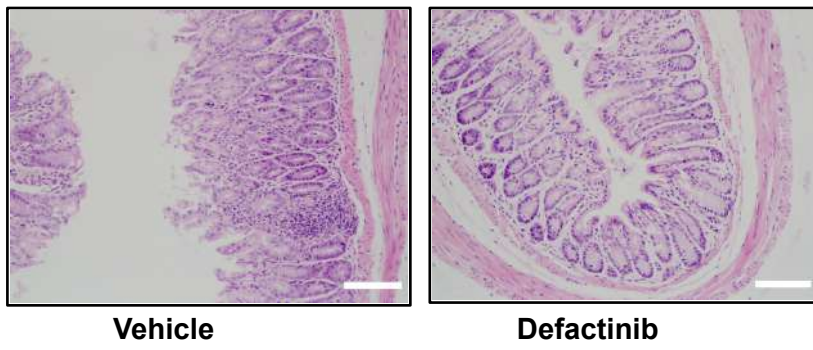

**b**

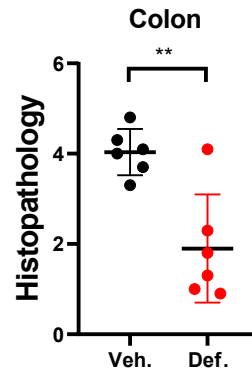

**c**

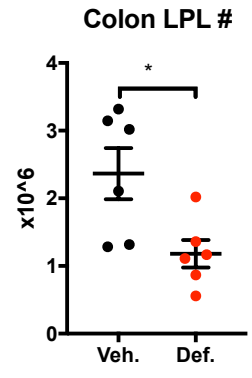

**d**

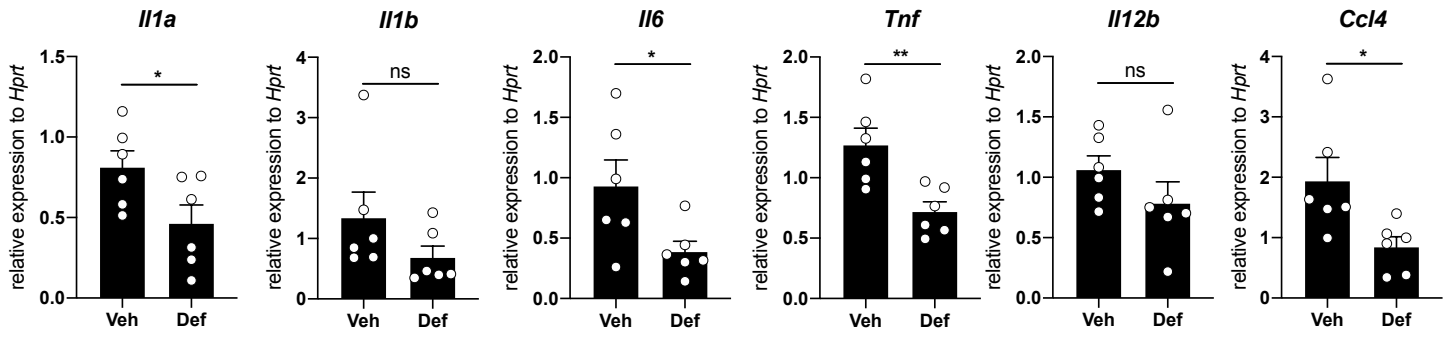

**e**

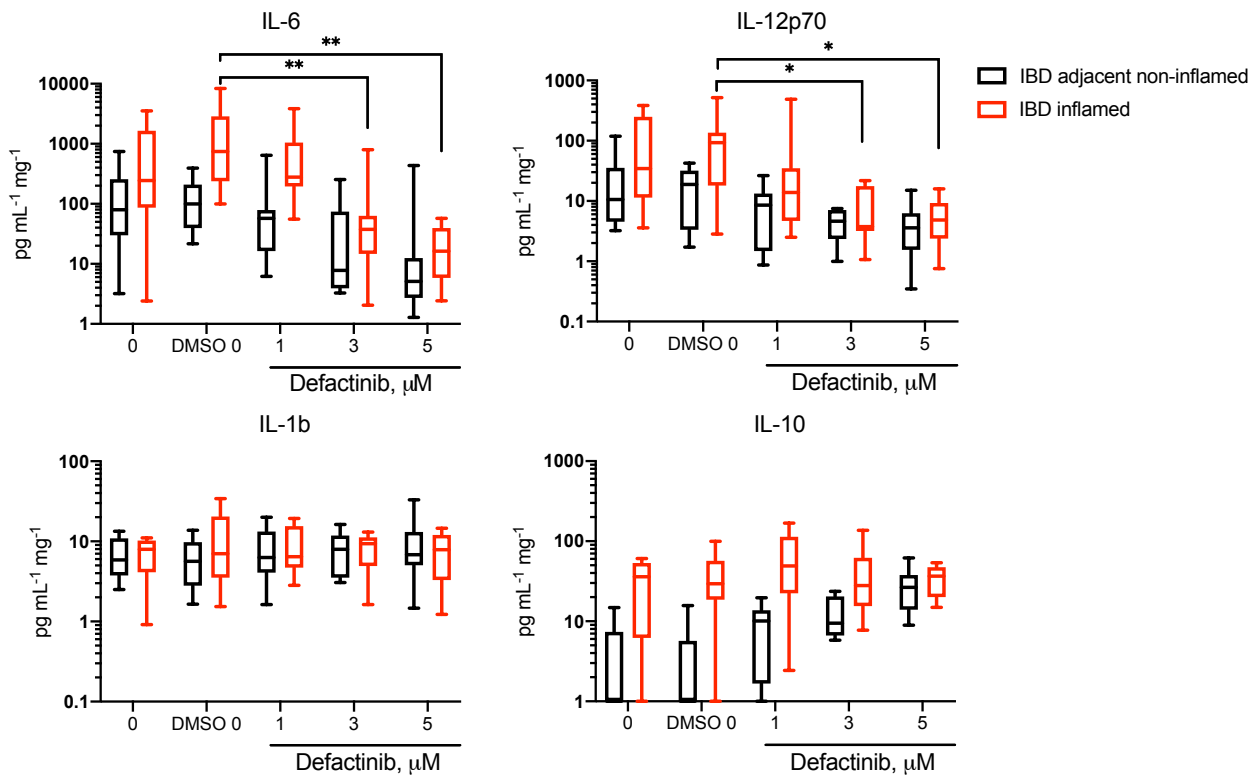

Source: https://biorxiv.org/content/10.1101/2020.05.24.113076v1.full.pdf
